# Supplementary material for: Synthesis of ionic liquid-supported hypervalent iodine reagent and its application as a ‘catch and release’ reagent for α-substituted acetophenones
Source: Royal Society of Chemistry journal article supplement (doi:10.1039/c4ra00063c), 2014-01-01
Supplement: c4ra00063c1.pdf [file c4ra00063c1.pdf]

## Supporting Information

### Synthesis of ionic liquid-supported hypervalent iodine reagent and its application as 'catch and release' reagent for $\alpha$ -substituted acetophenones

Manoj Kumar Muthyala,<sup>§</sup> Sunita Choudhary<sup>§</sup> and Anil Kumar\*

*Department of Chemistry, Birla Institute of Technology and Science, Pilani 333 031, Rajasthan, India.*

*Fax: 91 1596 244183; Tel: 91 1596 515652; E-mail: [anilkumar@pilani.bits-pilani.ac.in](mailto:anilkumar@pilani.bits-pilani.ac.in)*

#### Content

|                                                                                                            |      |
|------------------------------------------------------------------------------------------------------------|------|
| 1. General information                                                                                     | 1    |
| 2. Copies of <sup>1</sup> H NMR and <sup>13</sup> C NMR spectra of <b>11</b> , <b>13a-g</b> & <b>14-16</b> | 2-34 |
| 3. HPLC analysis of <b>14a</b>                                                                             | 35   |

#### 1. General informatin

The NMR spectra were recorded on 300 MHz, 400 MHz and 500 MHz spectrometers using CDCl<sub>3</sub>, DMSO-*d*<sub>6</sub> and CD<sub>3</sub>OD as solvents. The chemical shifts were expressed in ppm. Reactions were monitored by thin-layer chromatography (TLC) carried out on silica-coated aluminum plates (60F-254) using UV light as visualizing agent. High resolution mass spectra (HRMS) were recorded on a mass spectrometer using electrospray ionization-time of flight (ESI-TOF). Melting points were determined on open capillary tube on automated melting point apparatus and are uncorrected. All the chemicals and reagents were purchased at the highest commercial quality and used without further purification, unless otherwise stated.

## 2. Copies of $^1\text{H}$ and $^{13}\text{C}$ NMR spectra

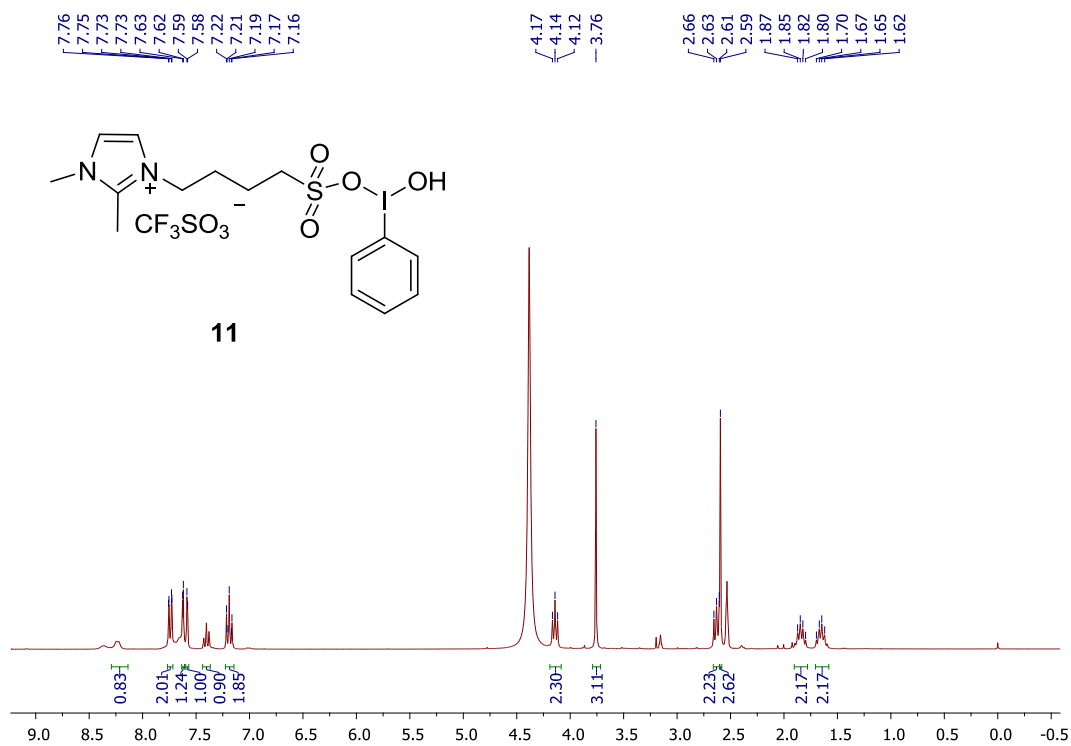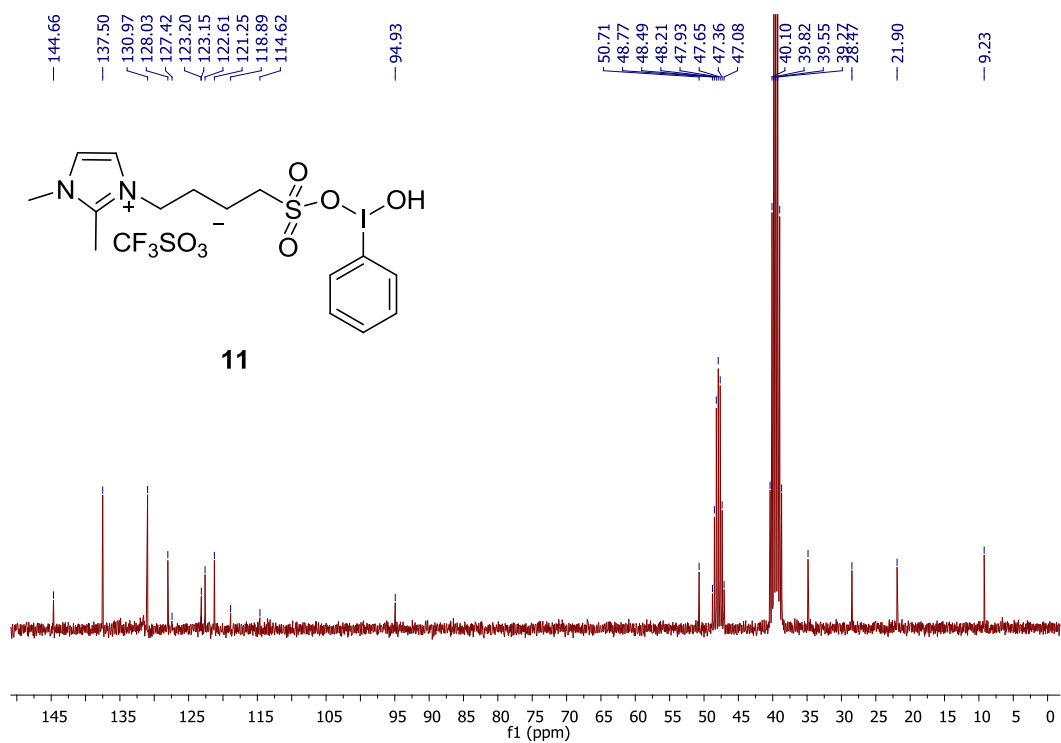

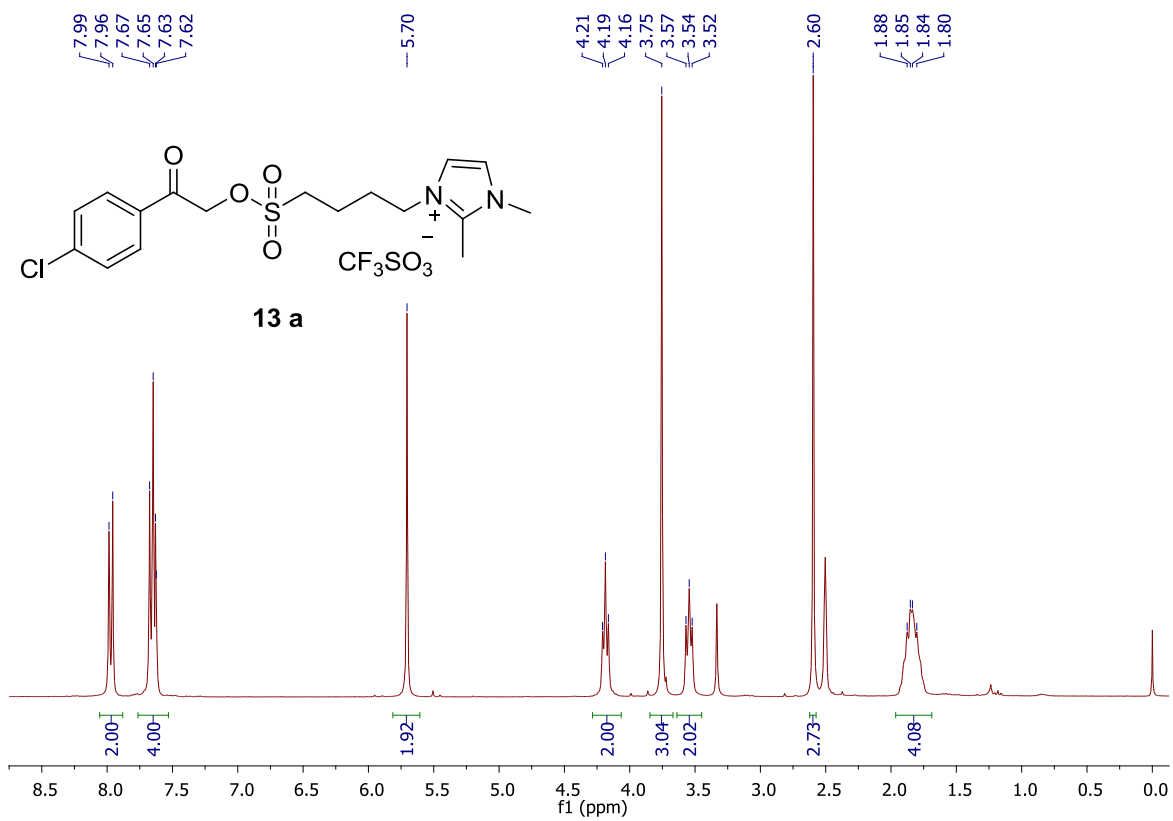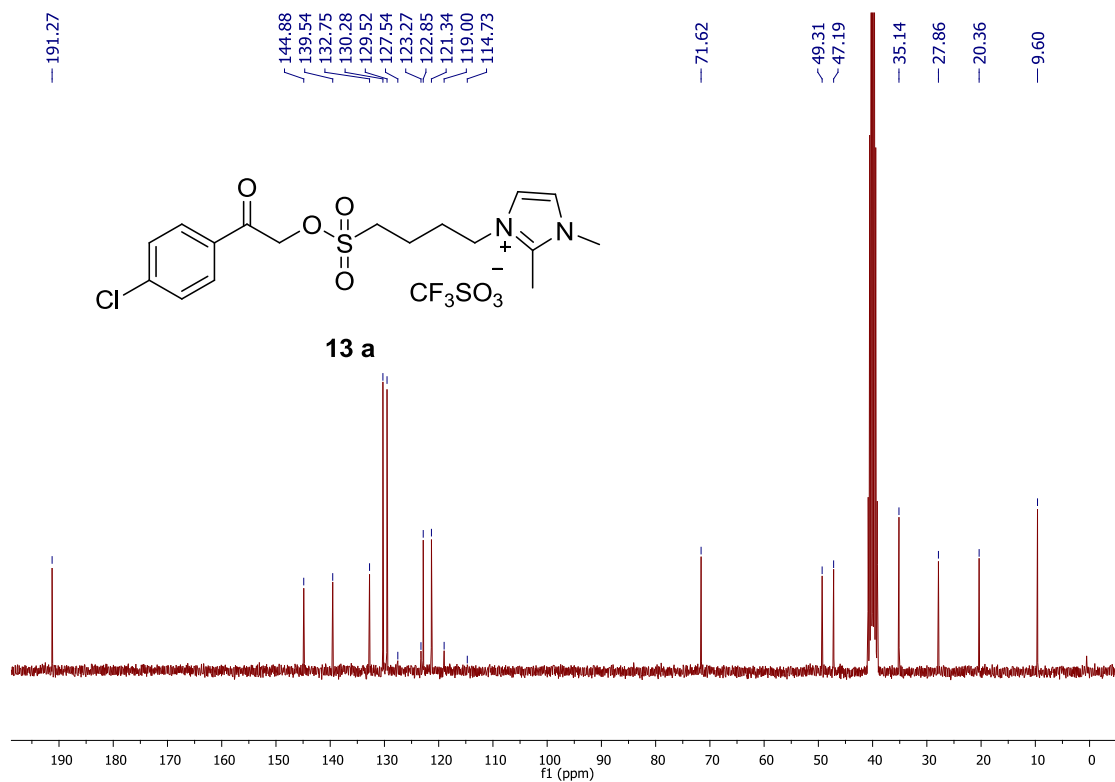

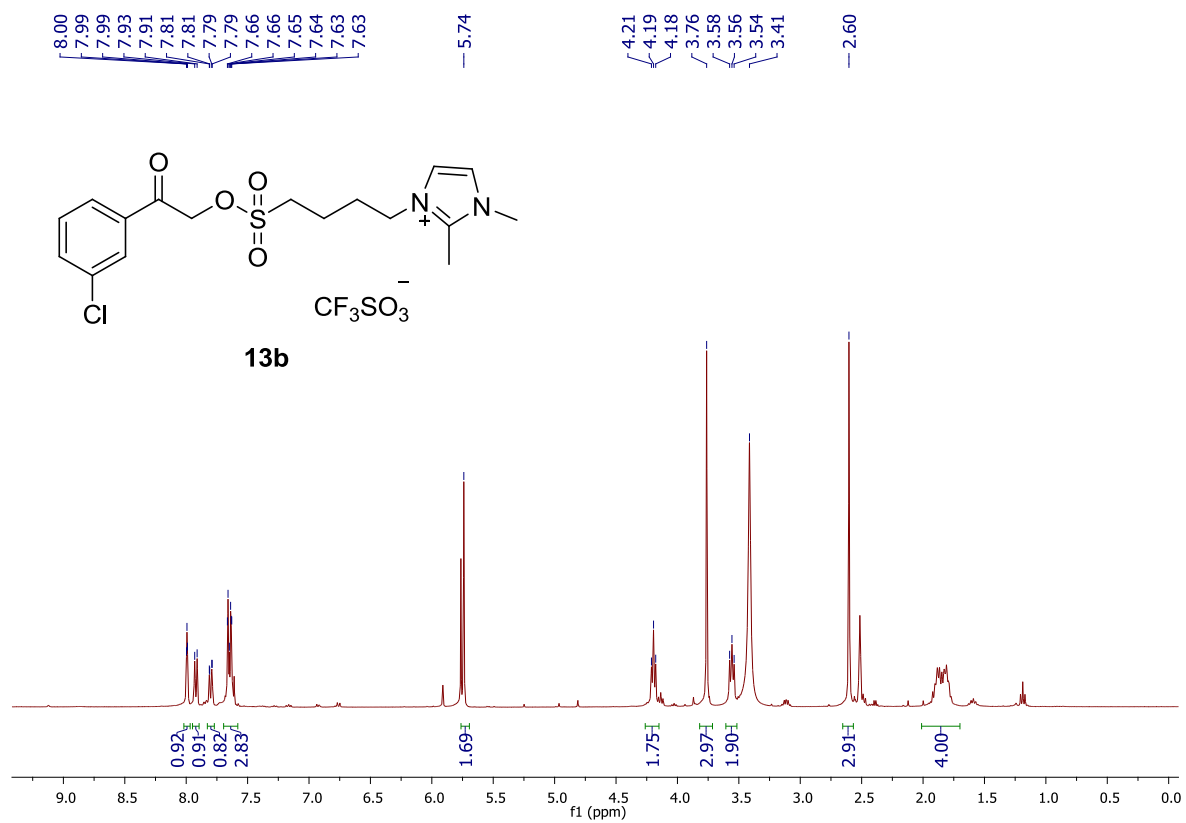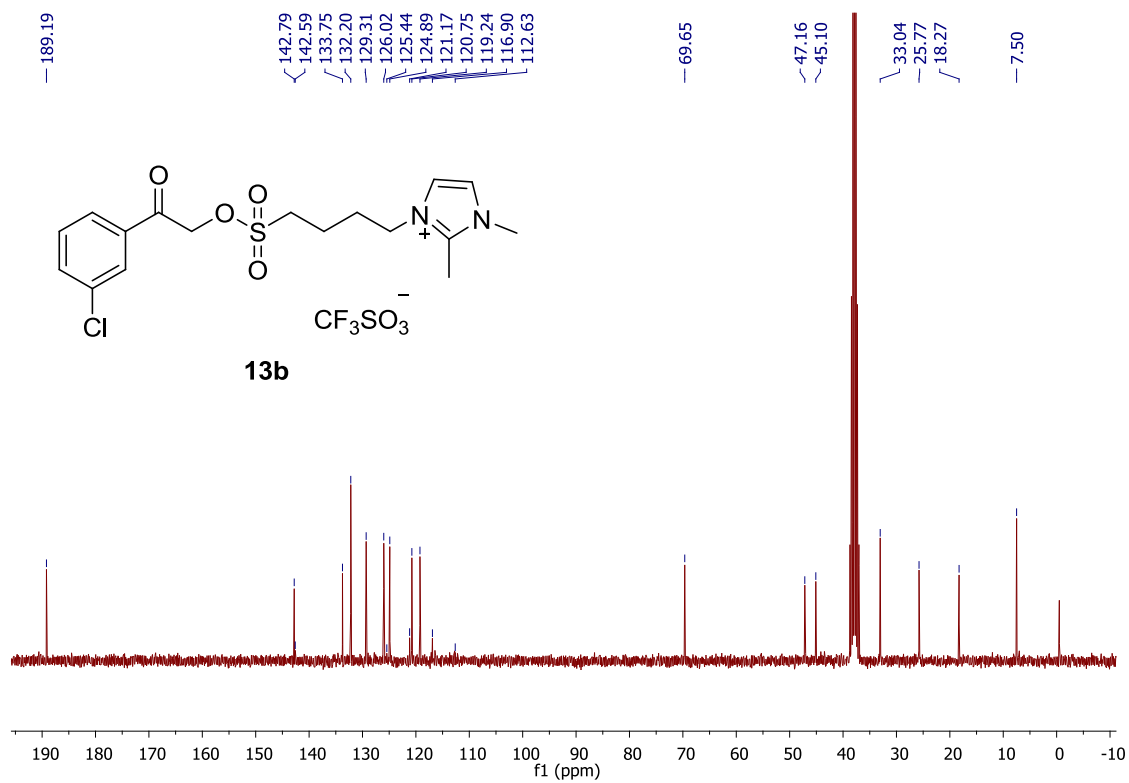

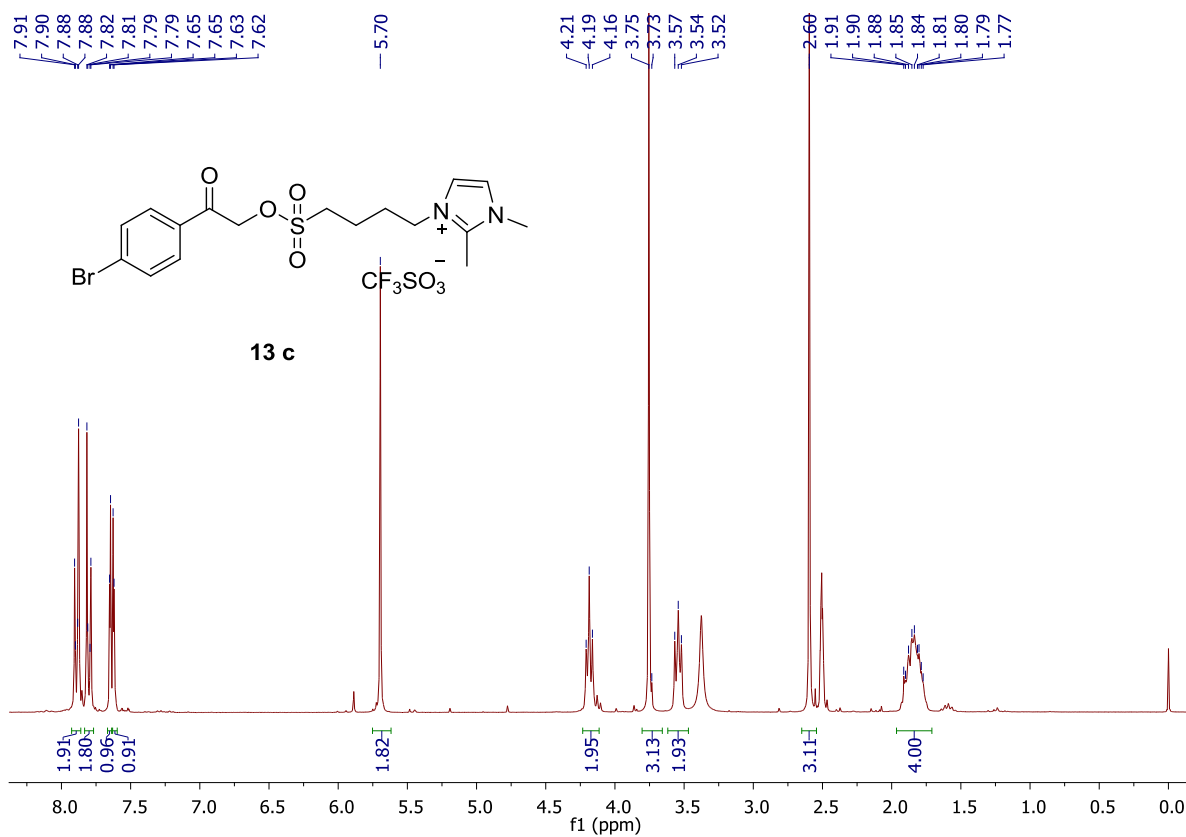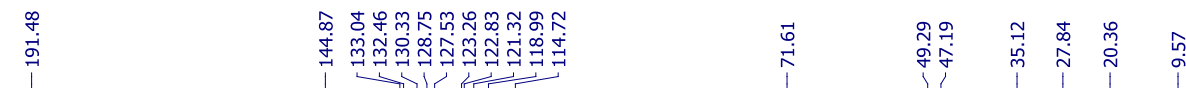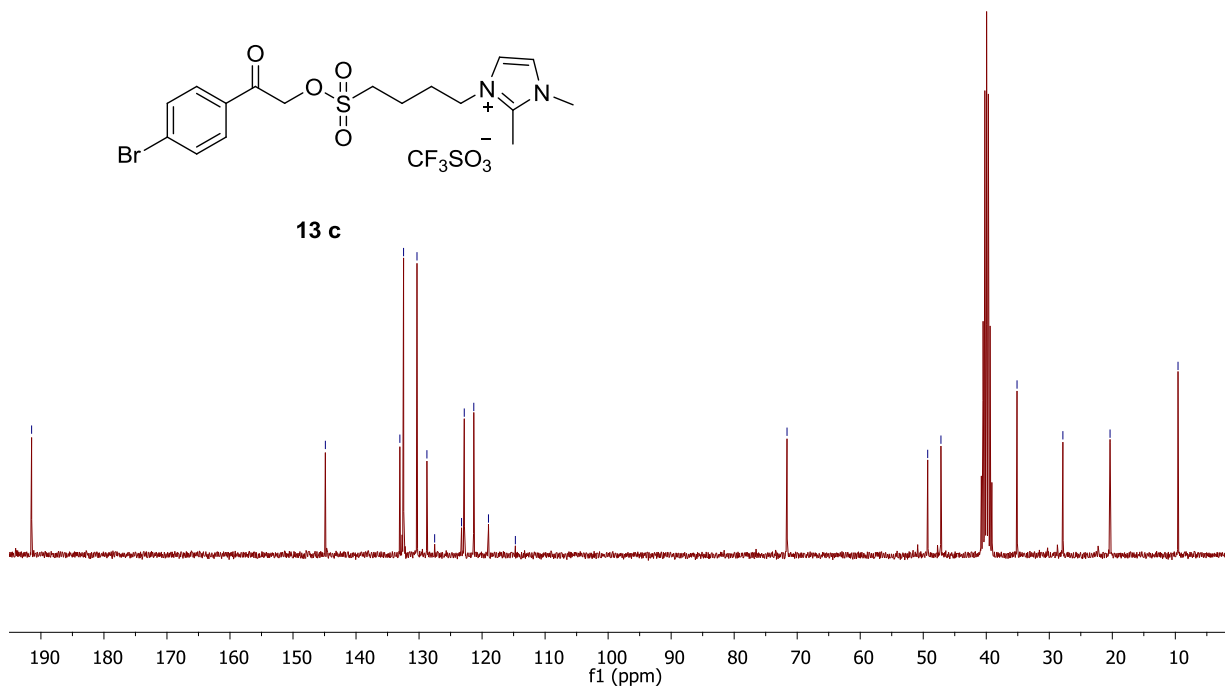

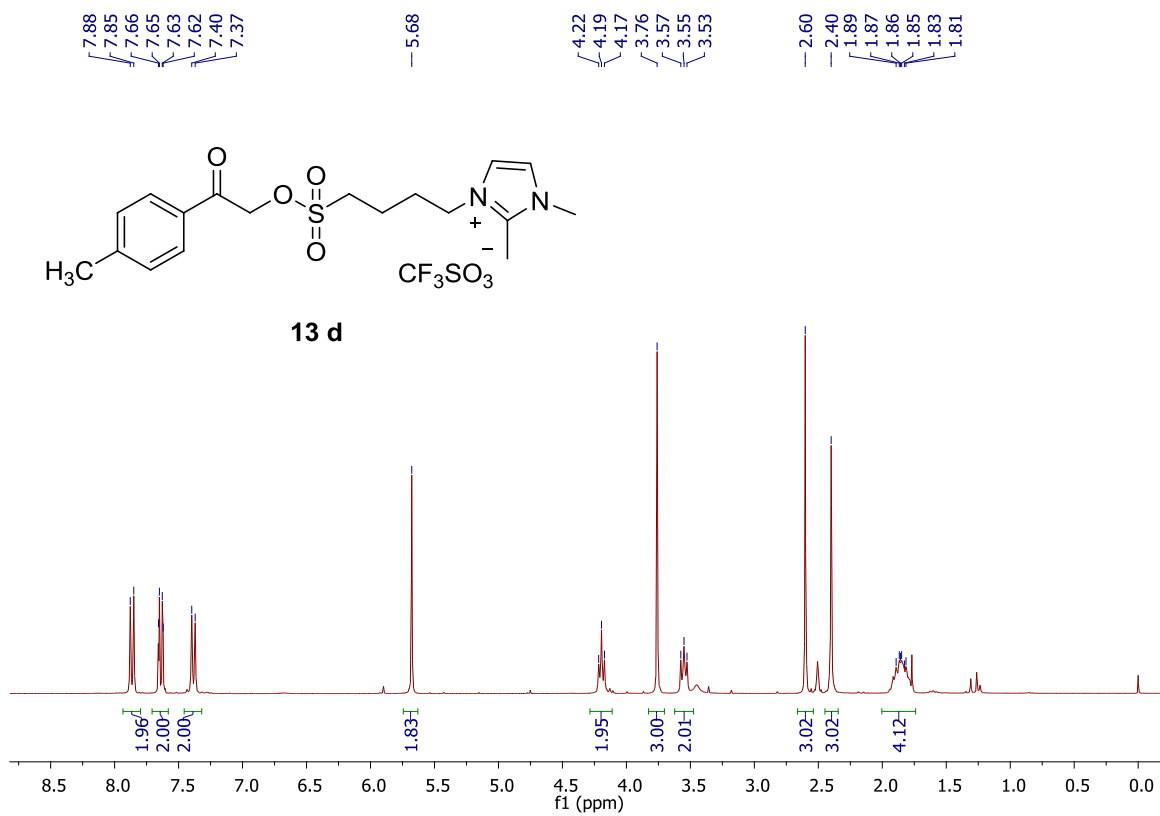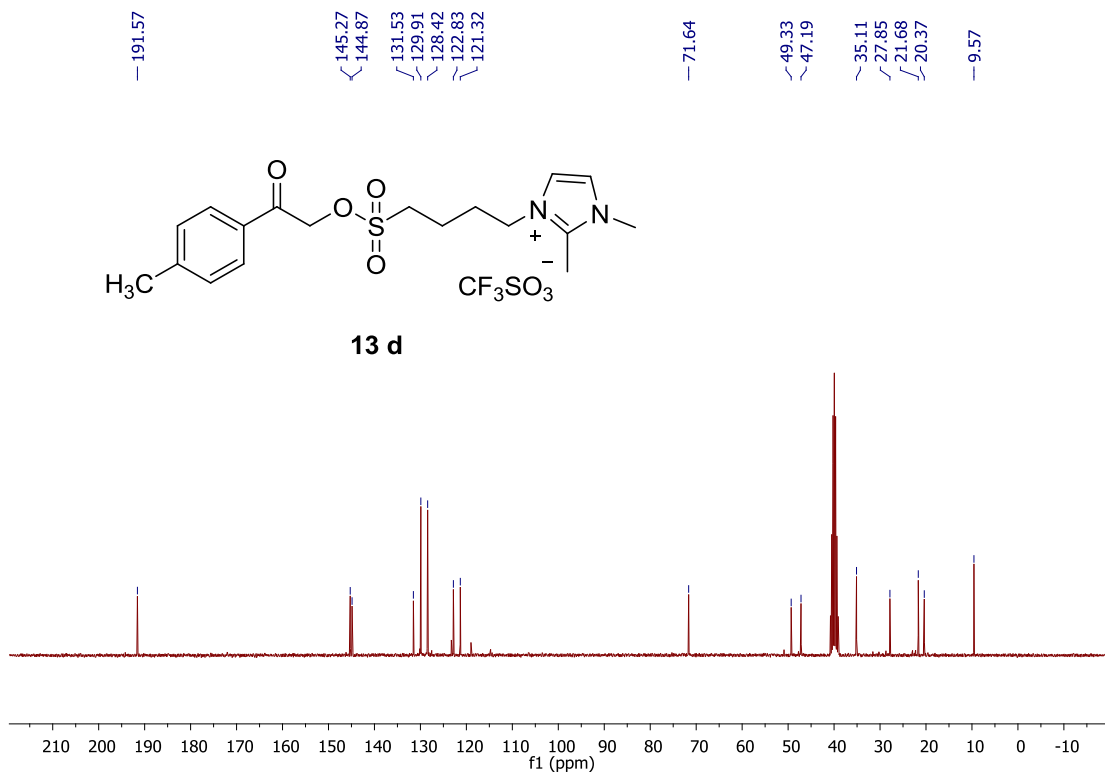

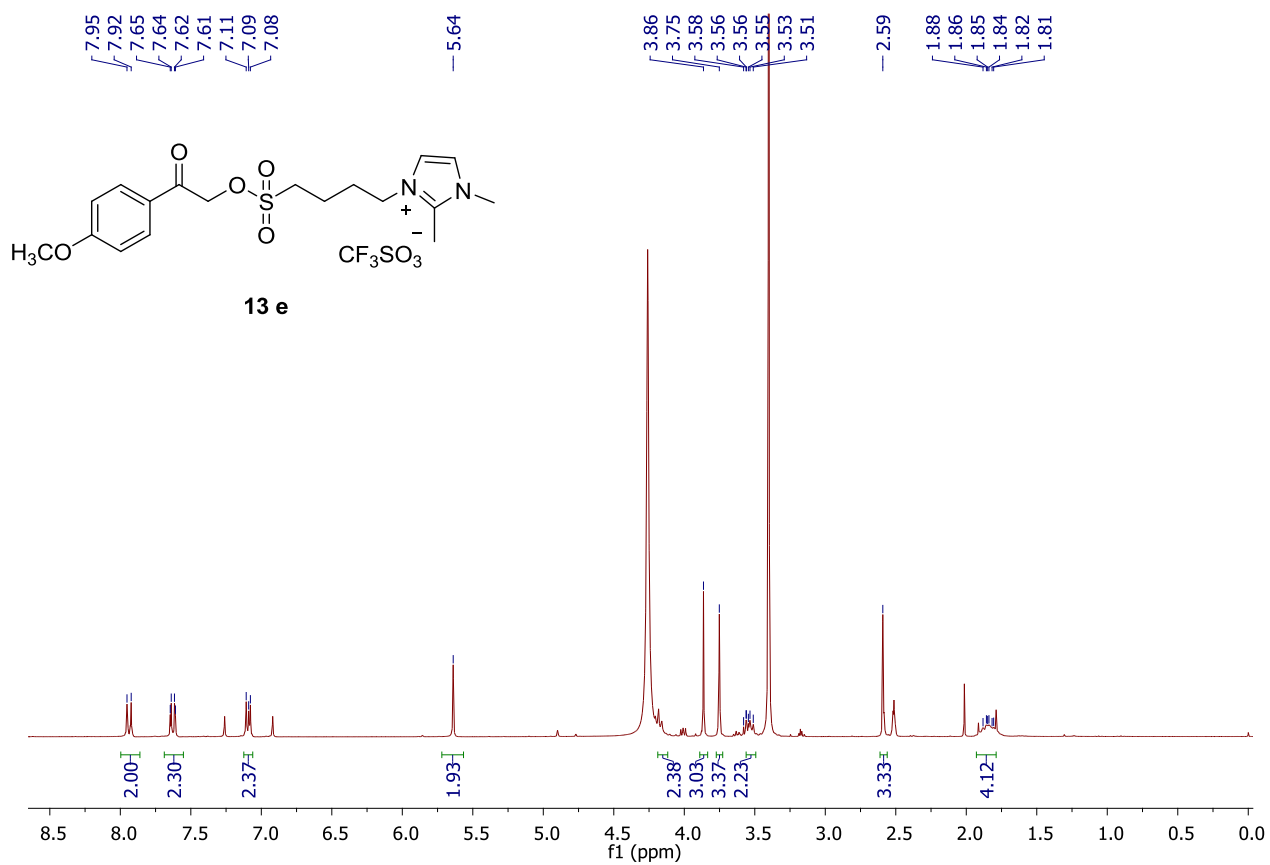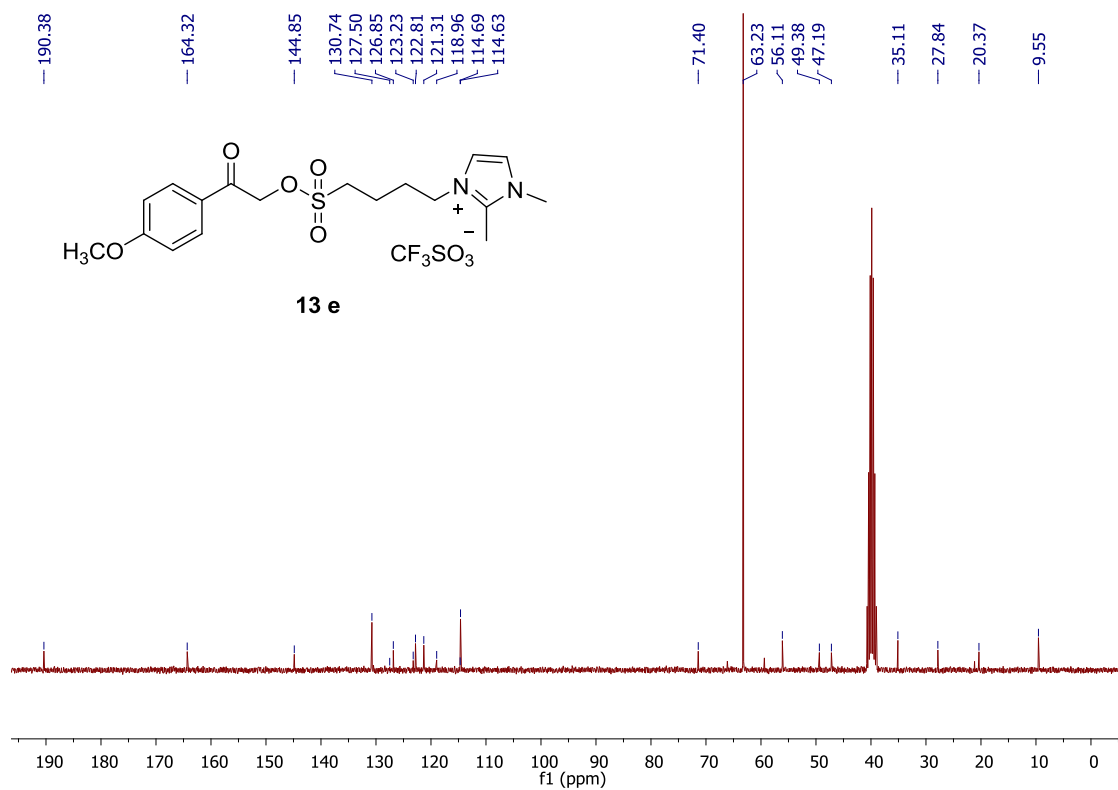

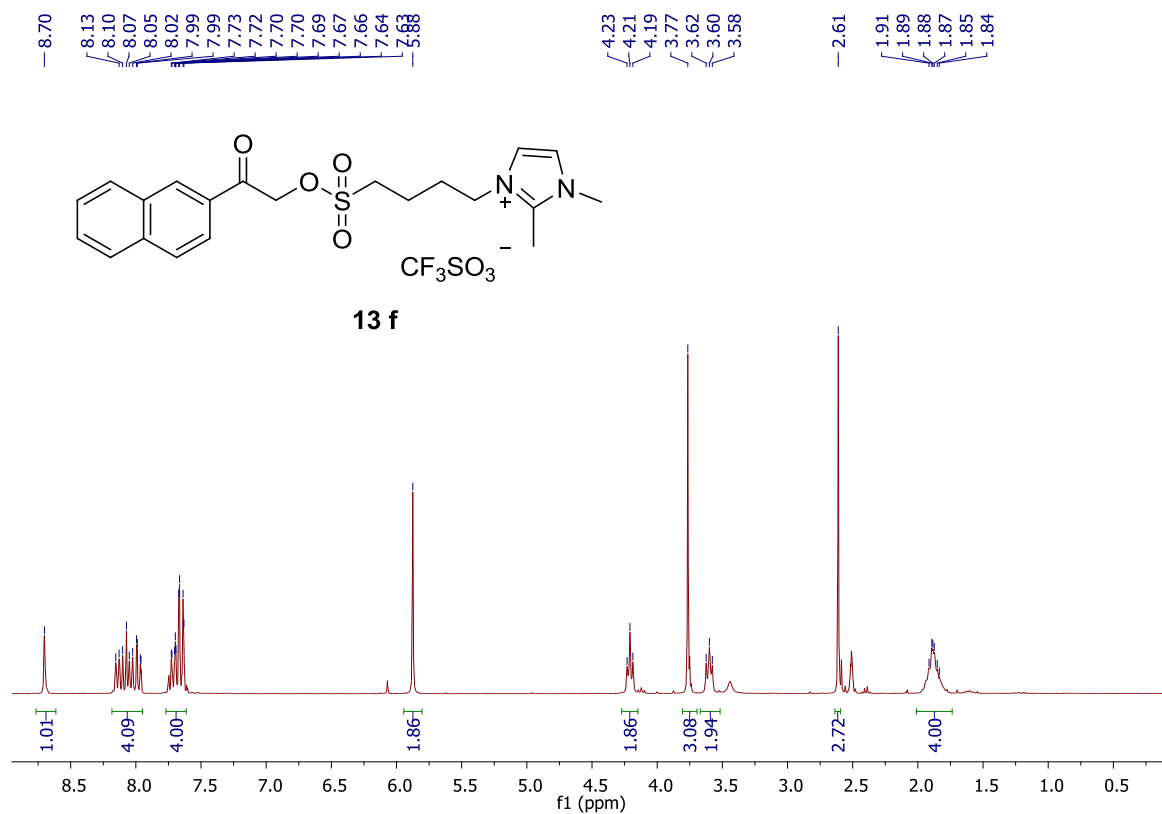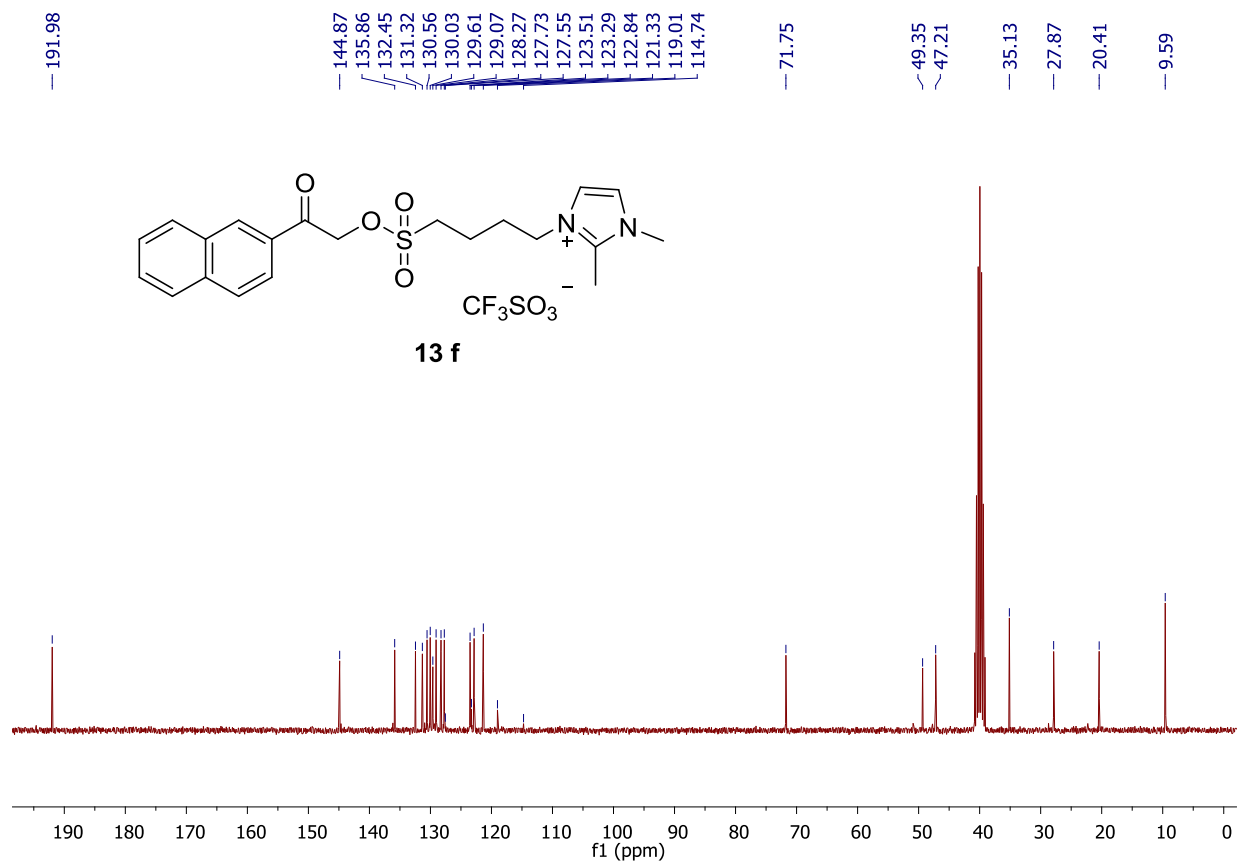



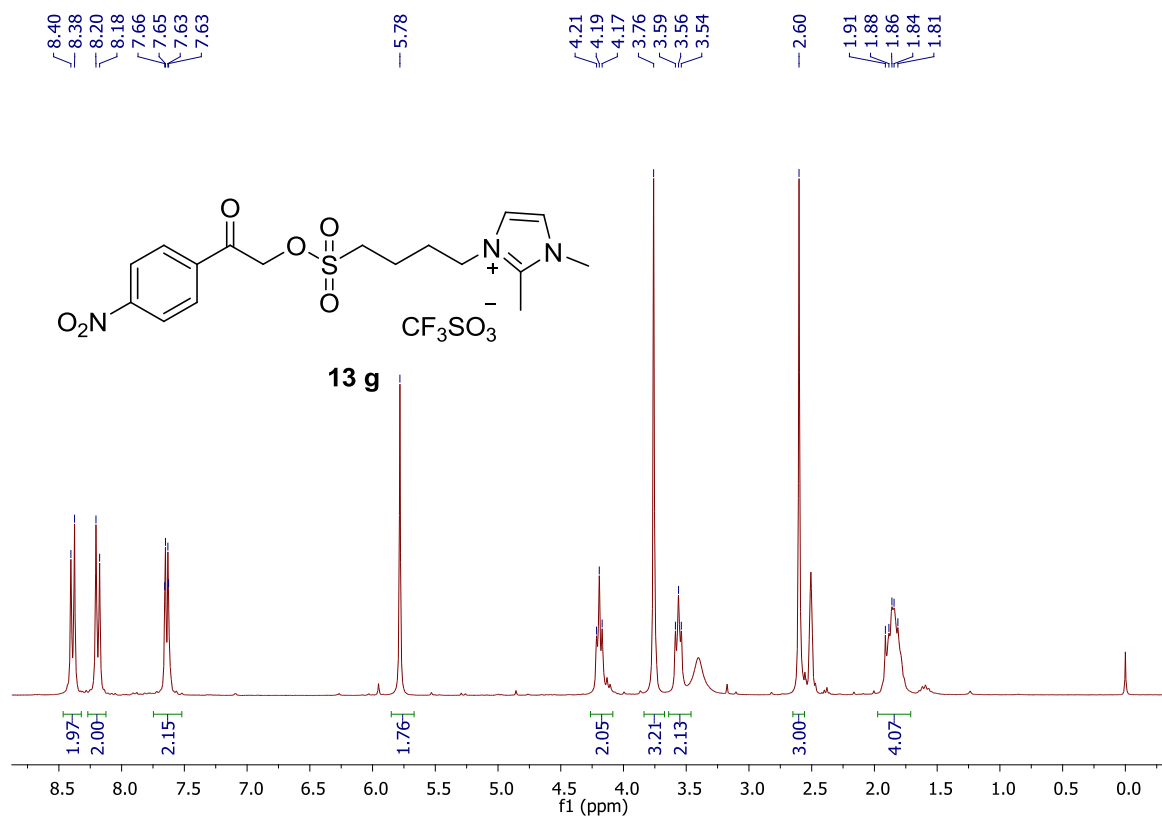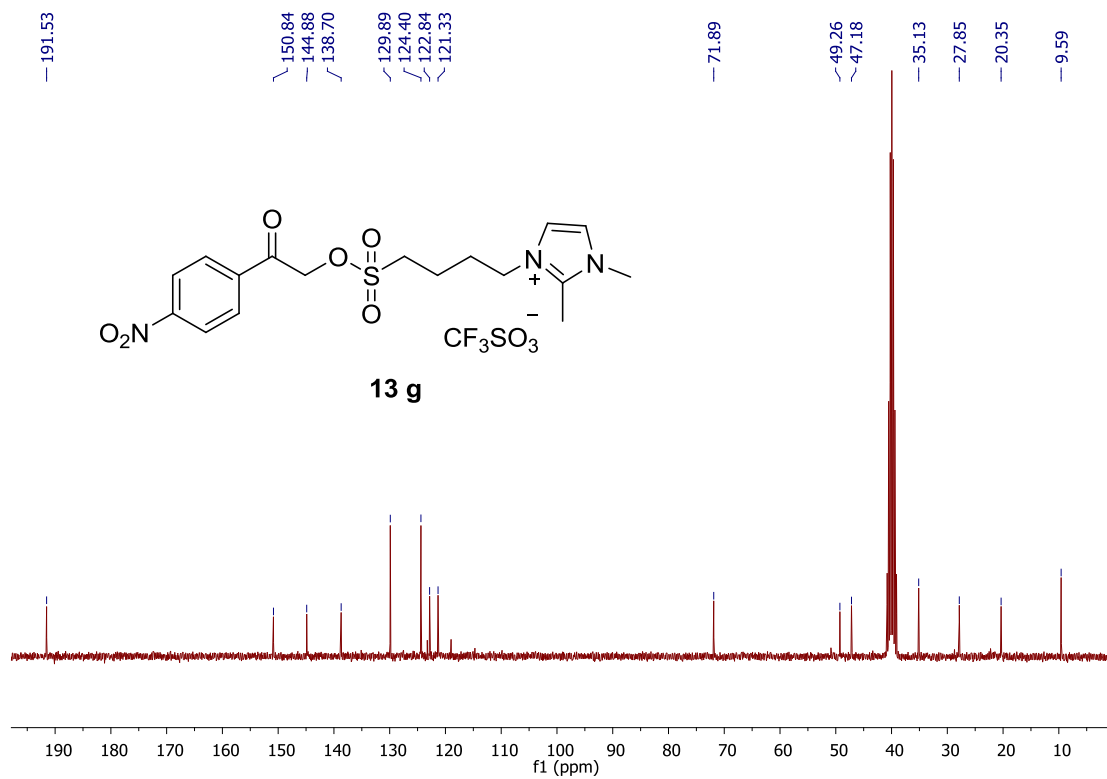

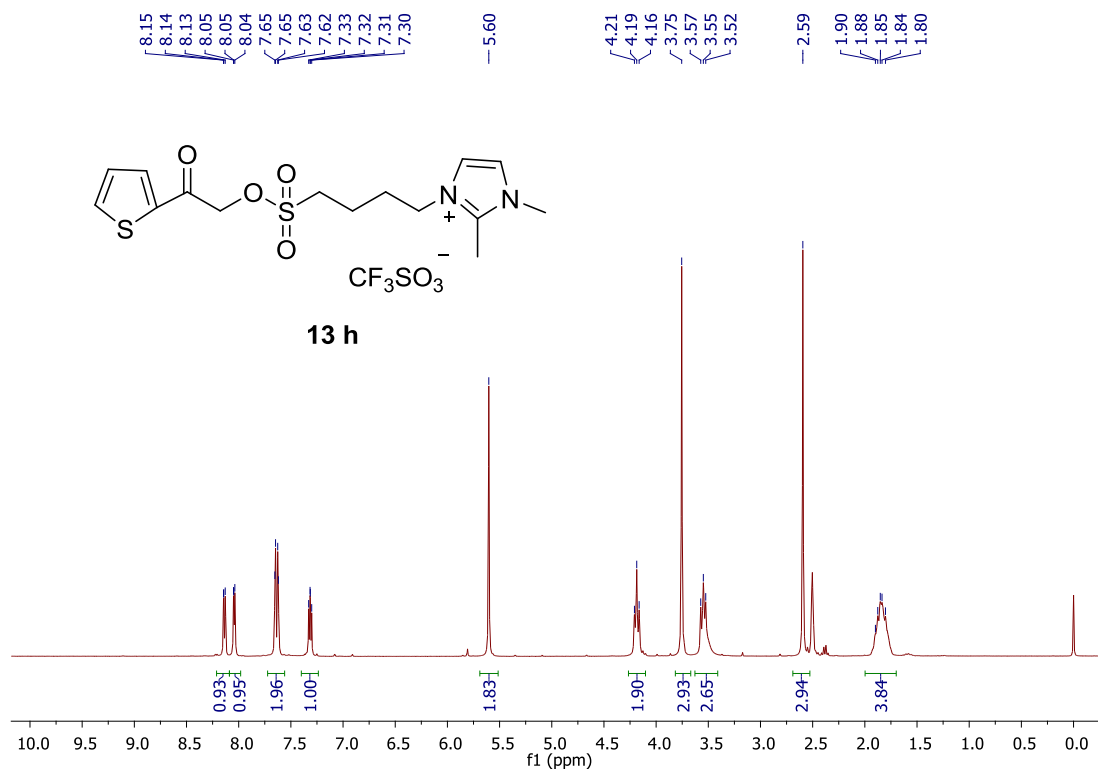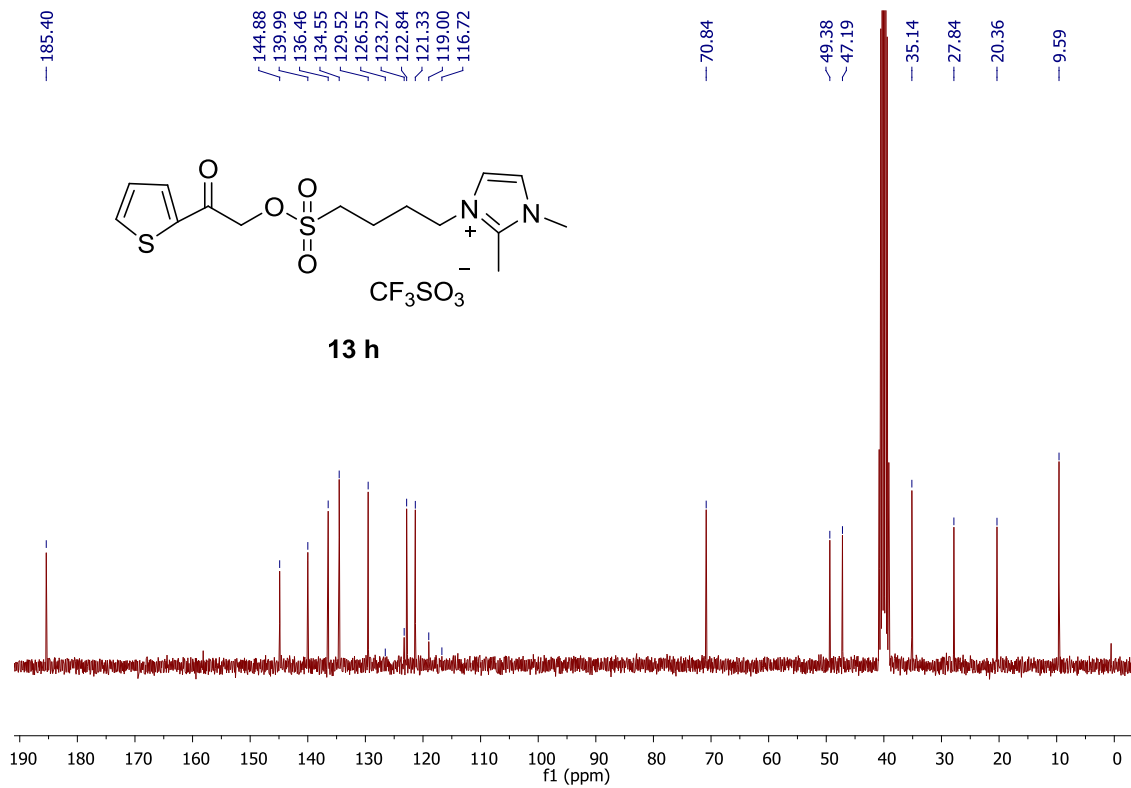

# 1-(4-Chlorophenyl)-2-thiocyanatoethanone

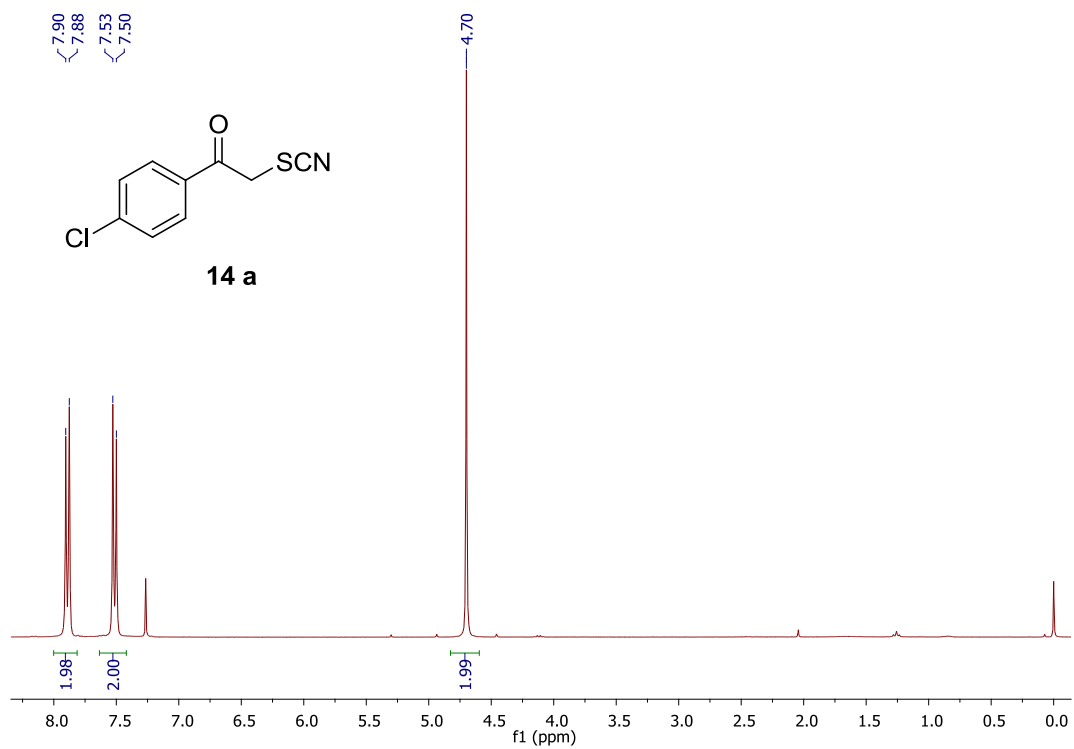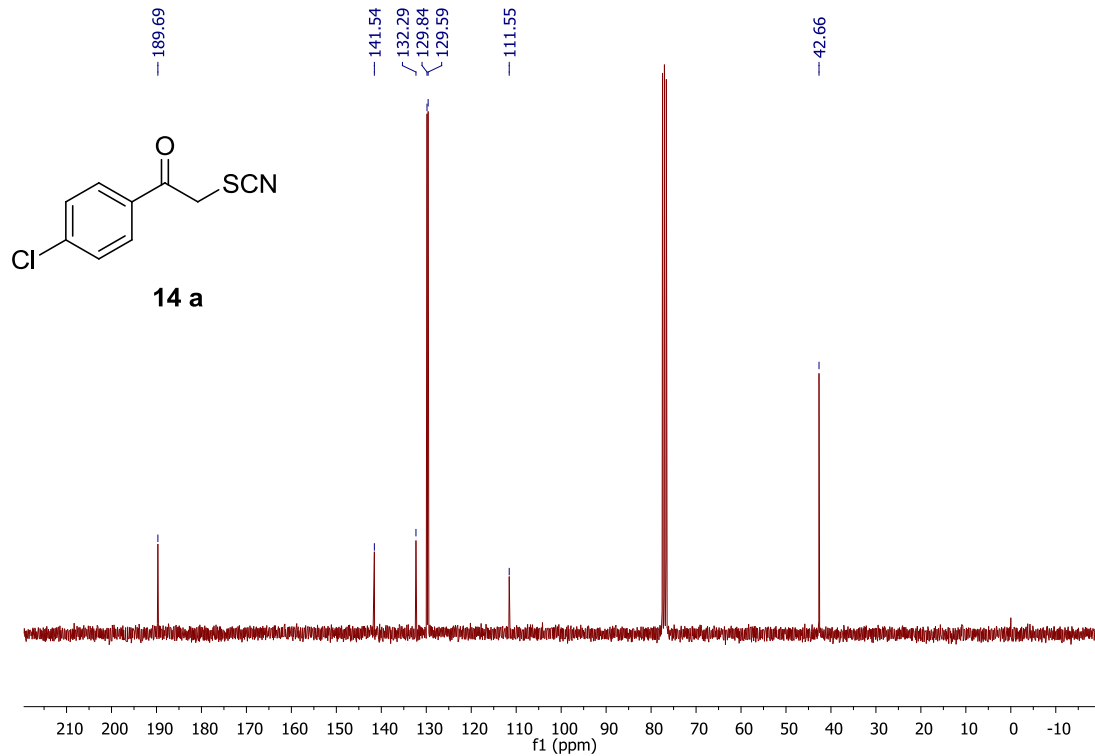

1-(3-Chlorophenyl)-2-thiocyanatoethanone

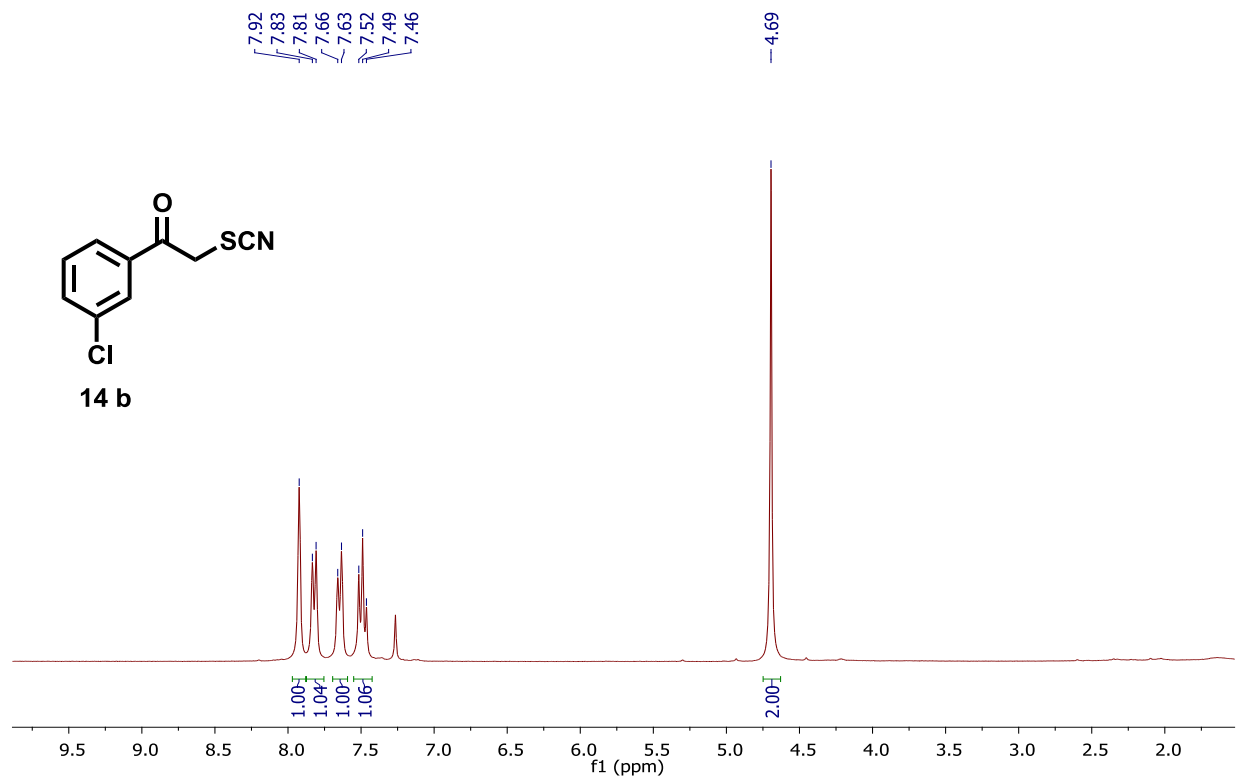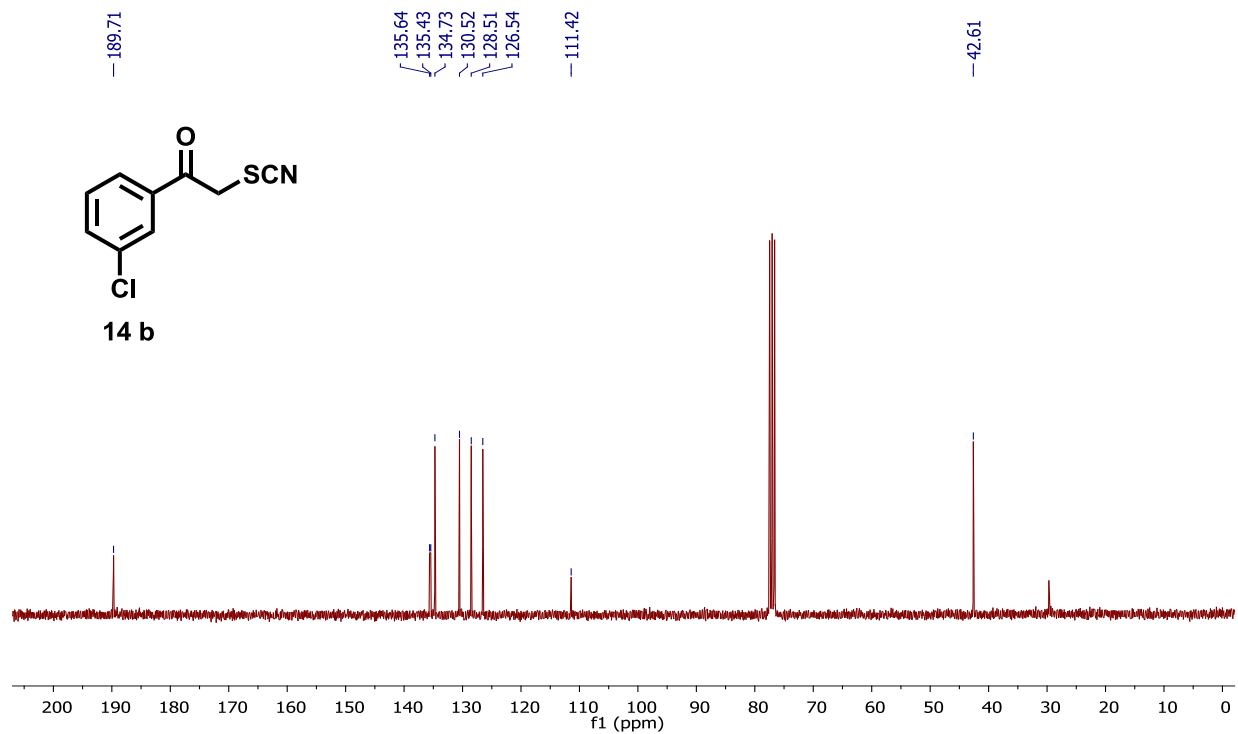

# 1-(4-Bromophenyl)-2-thiocyanatoethanone

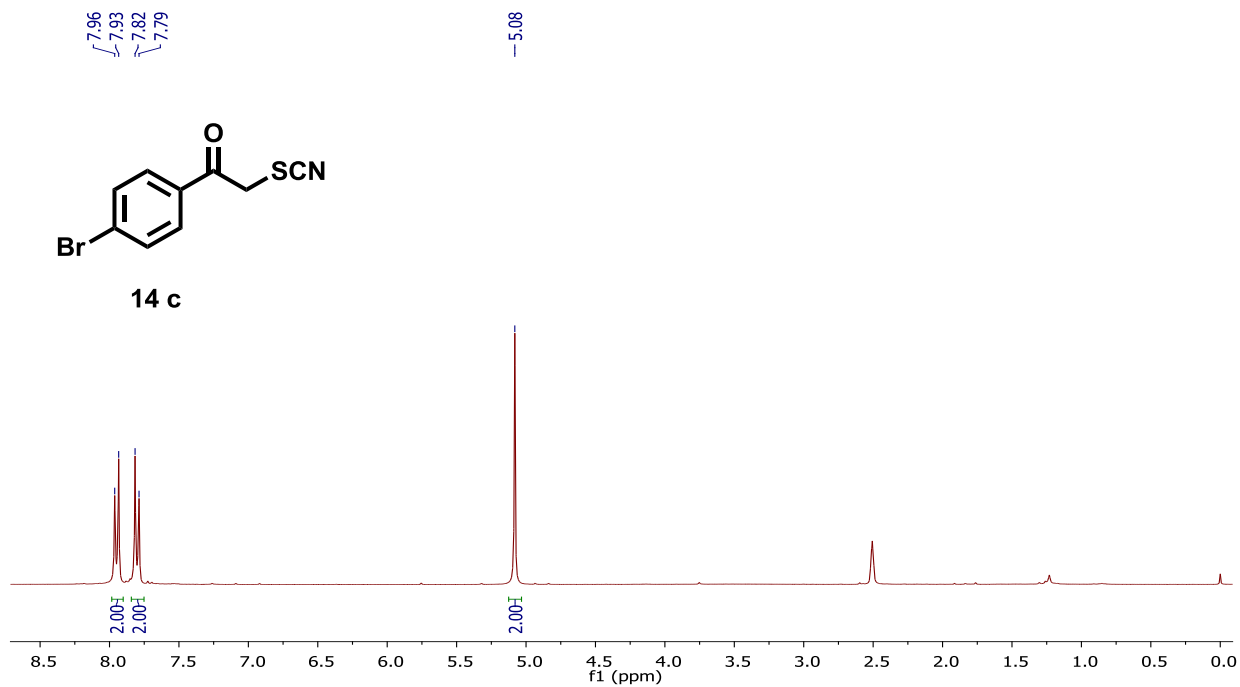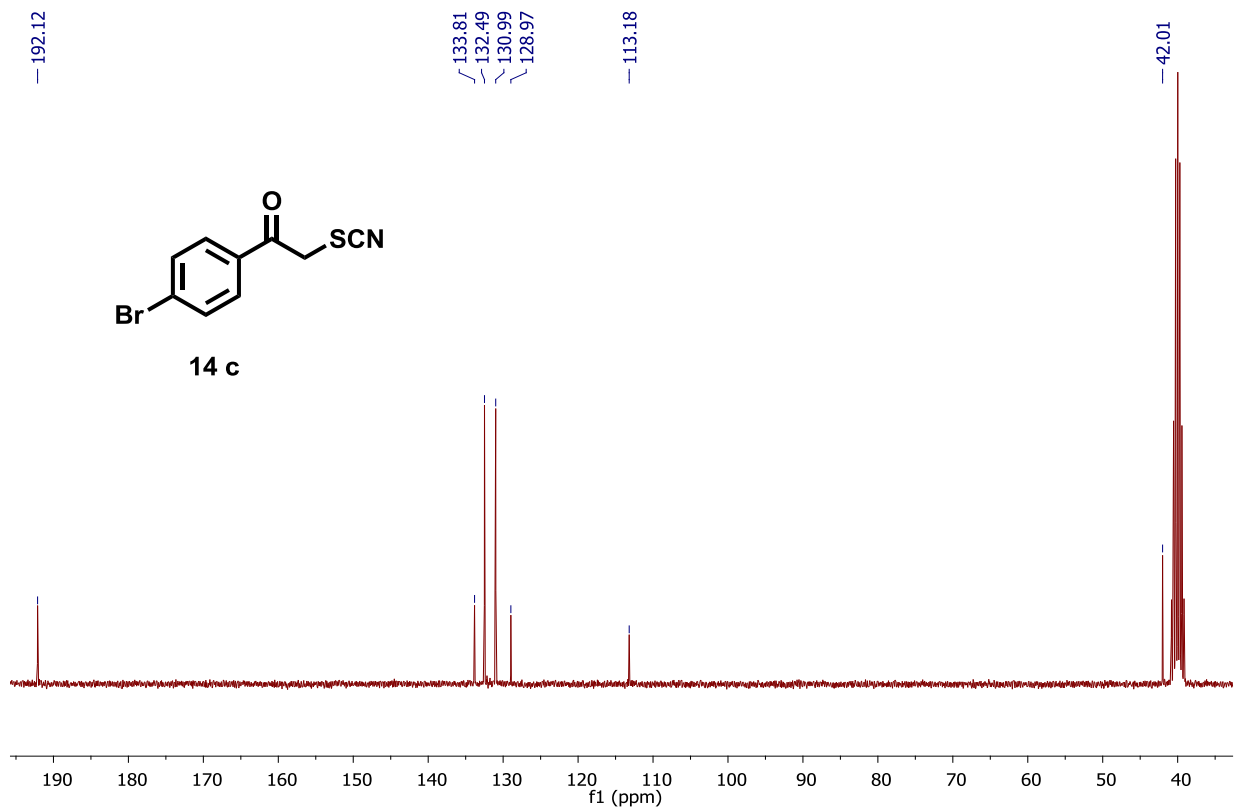

# 2-Thiocyanato-1-tolyethanone

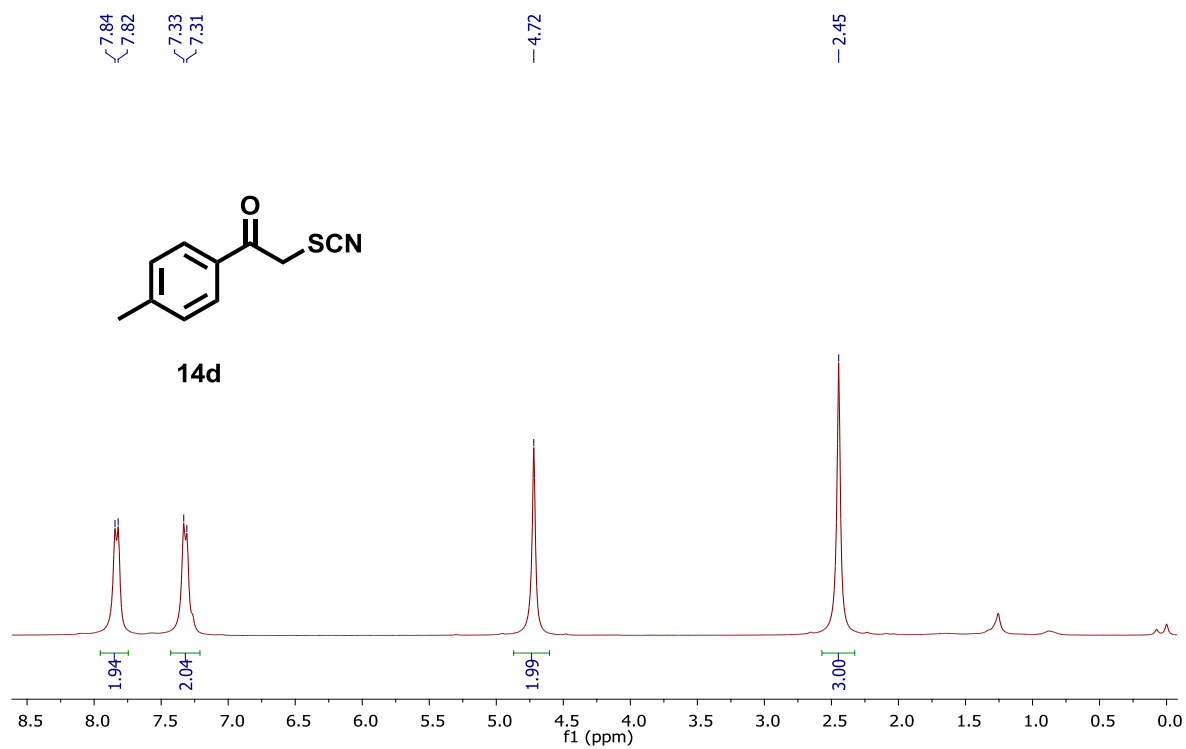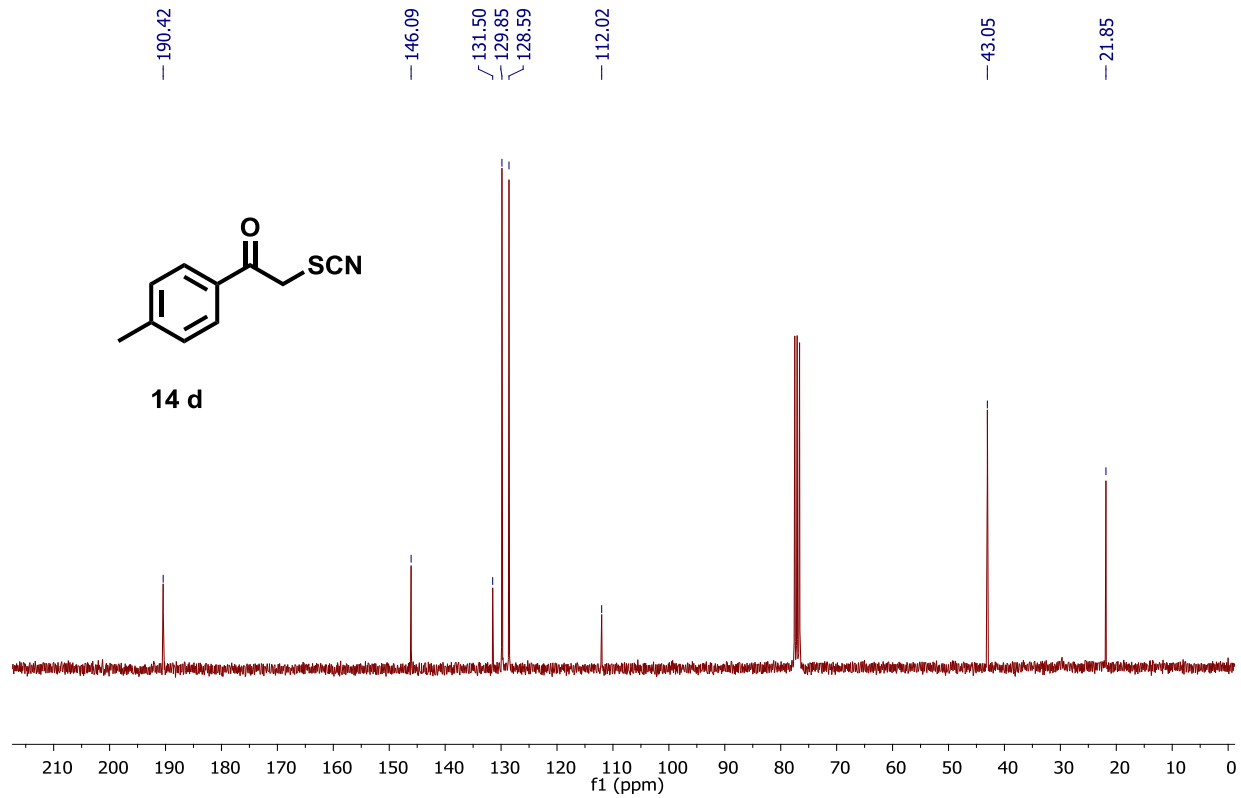

(4-Methoxyphenyl)-2-thiocyanatoethanone

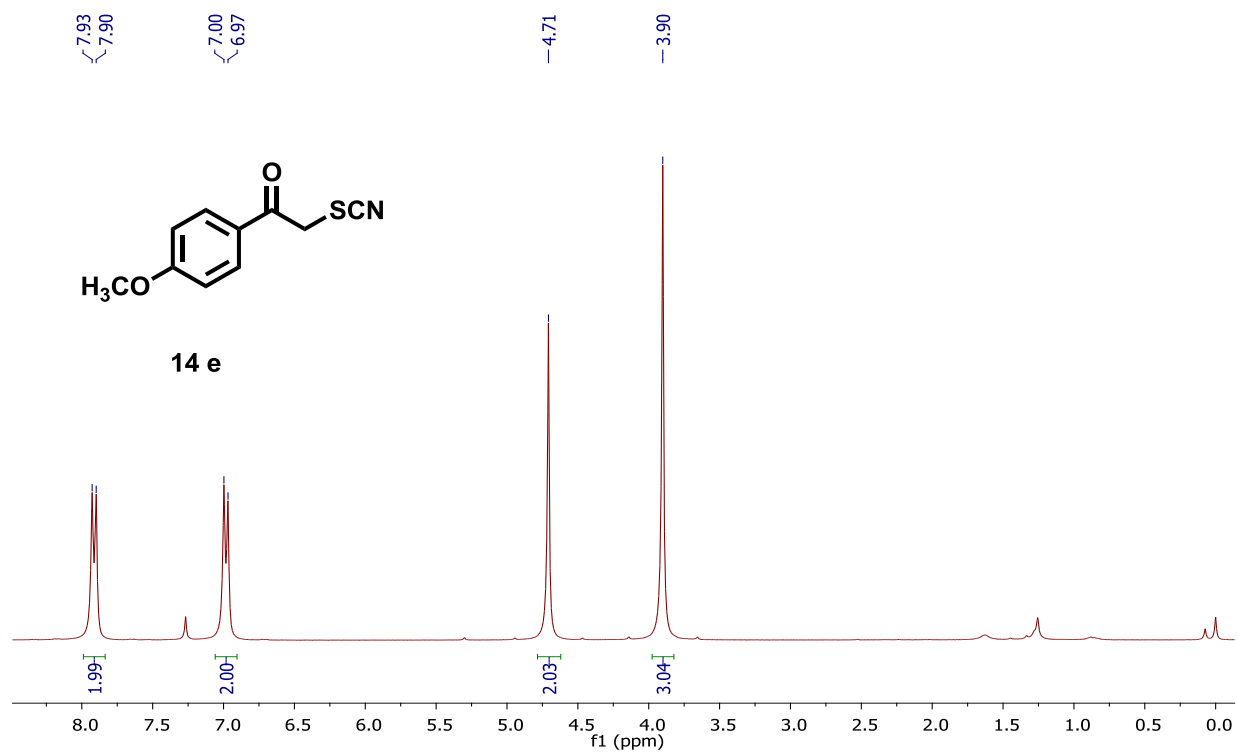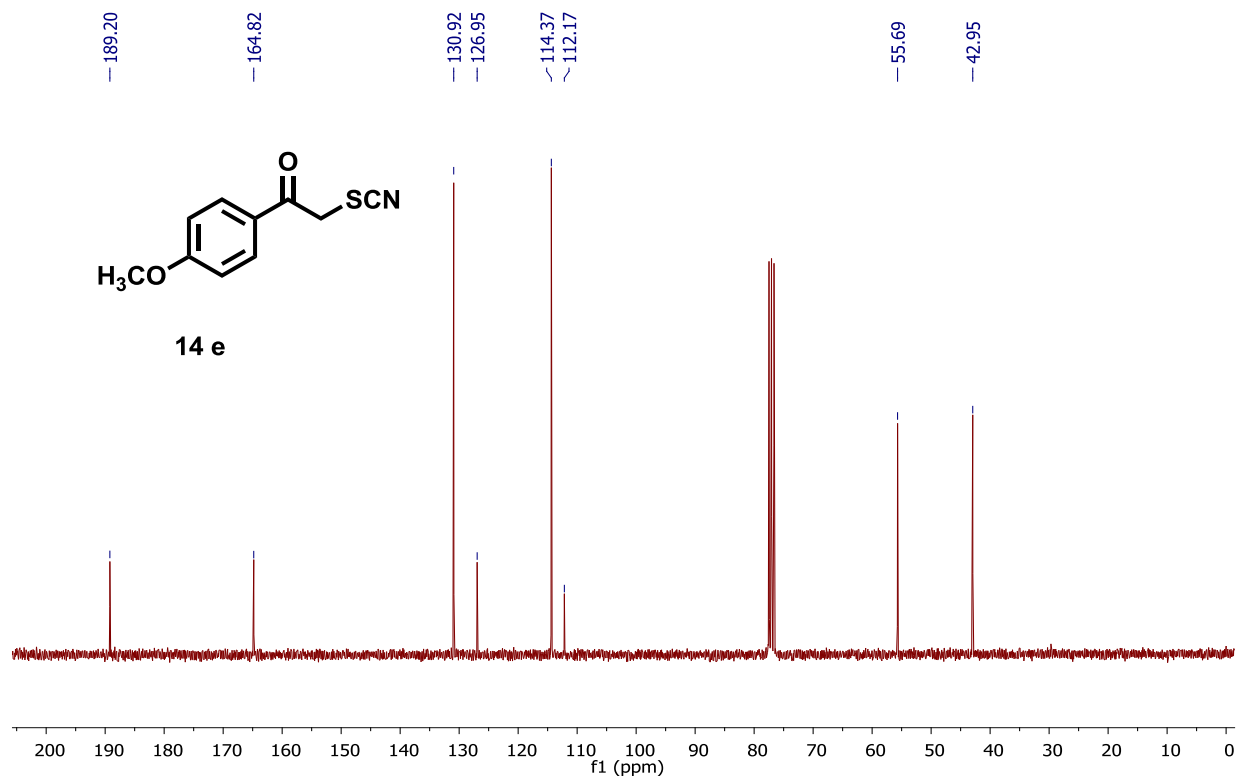

1-(Naphthalene-2-yl)2-thiocyanatoethanone

8.40 7.97 7.94 7.92 7.90 7.87 7.68 7.66 7.63 7.62 7.59 7.57 4.83

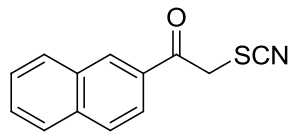

14 f

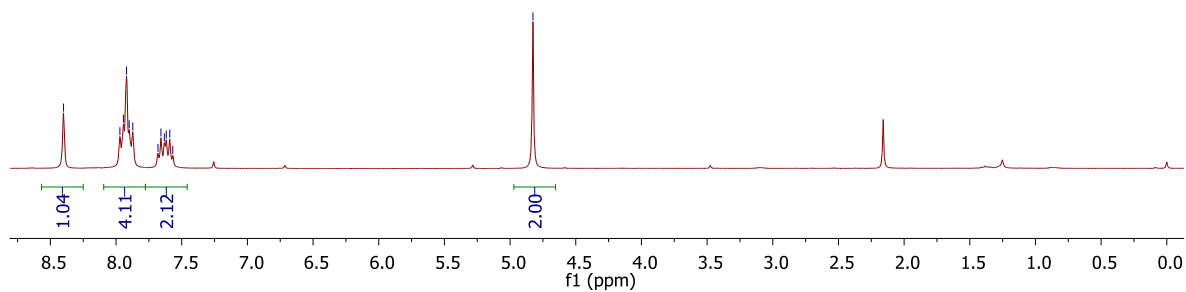

190.78 136.16 132.28 131.25 130.83 129.75 129.56 129.18 127.97 123.31 112.02 43.11

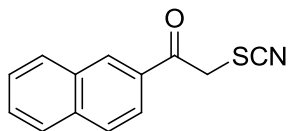

14 f

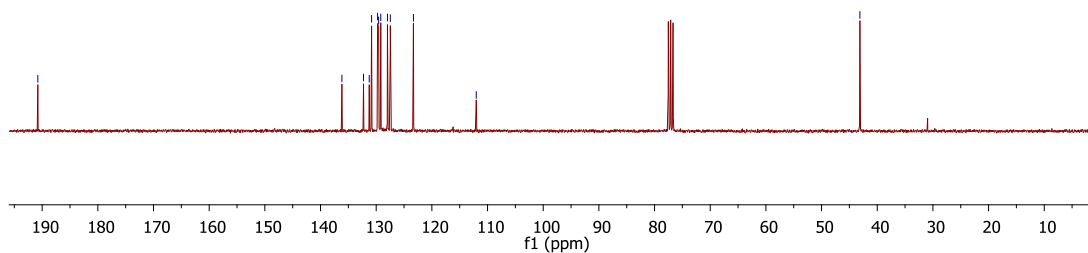



# 1-(4-Nitrophenyl)-2-thiocyanatoethanone

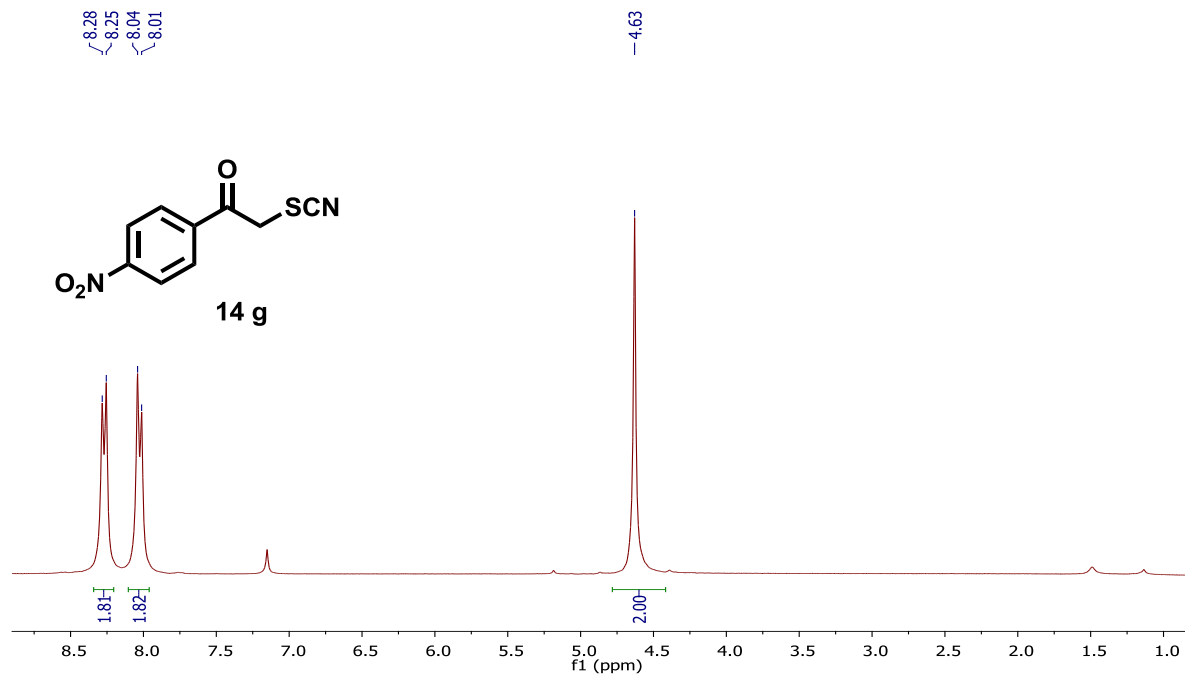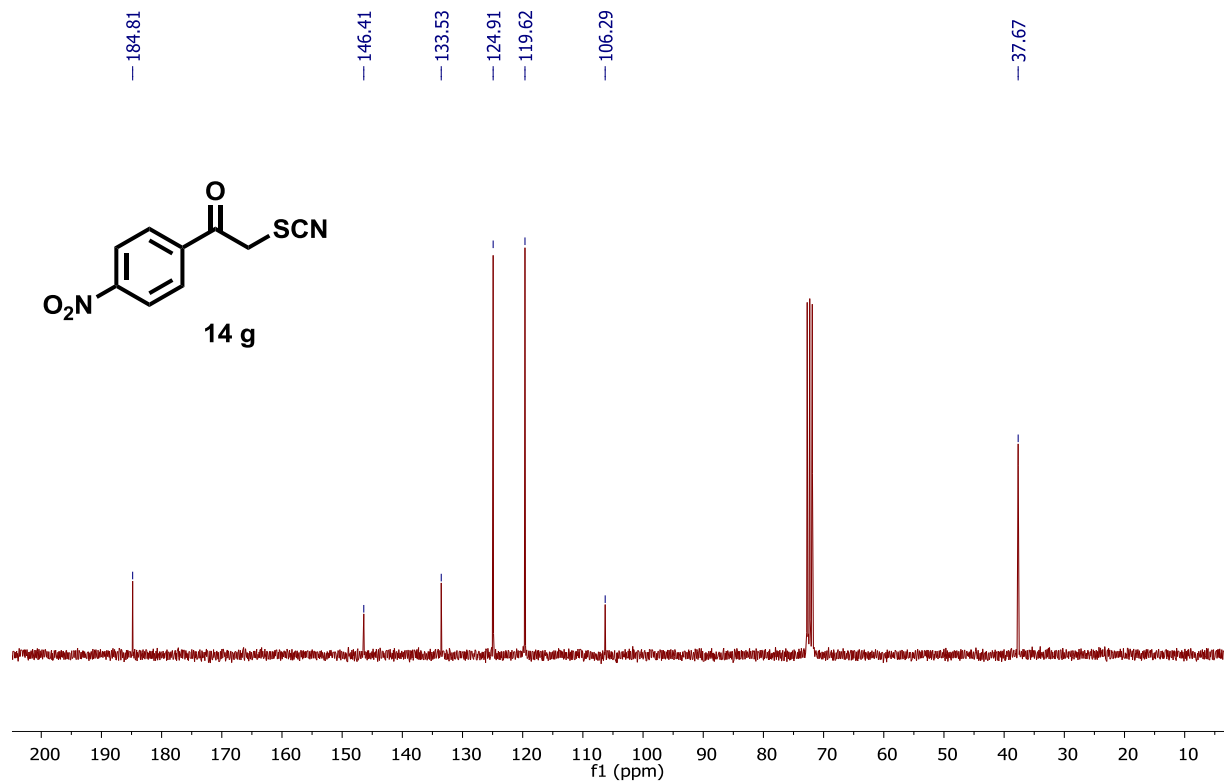

# 2-Thiocyanato-1-(thiophen-2-yl)ethanone

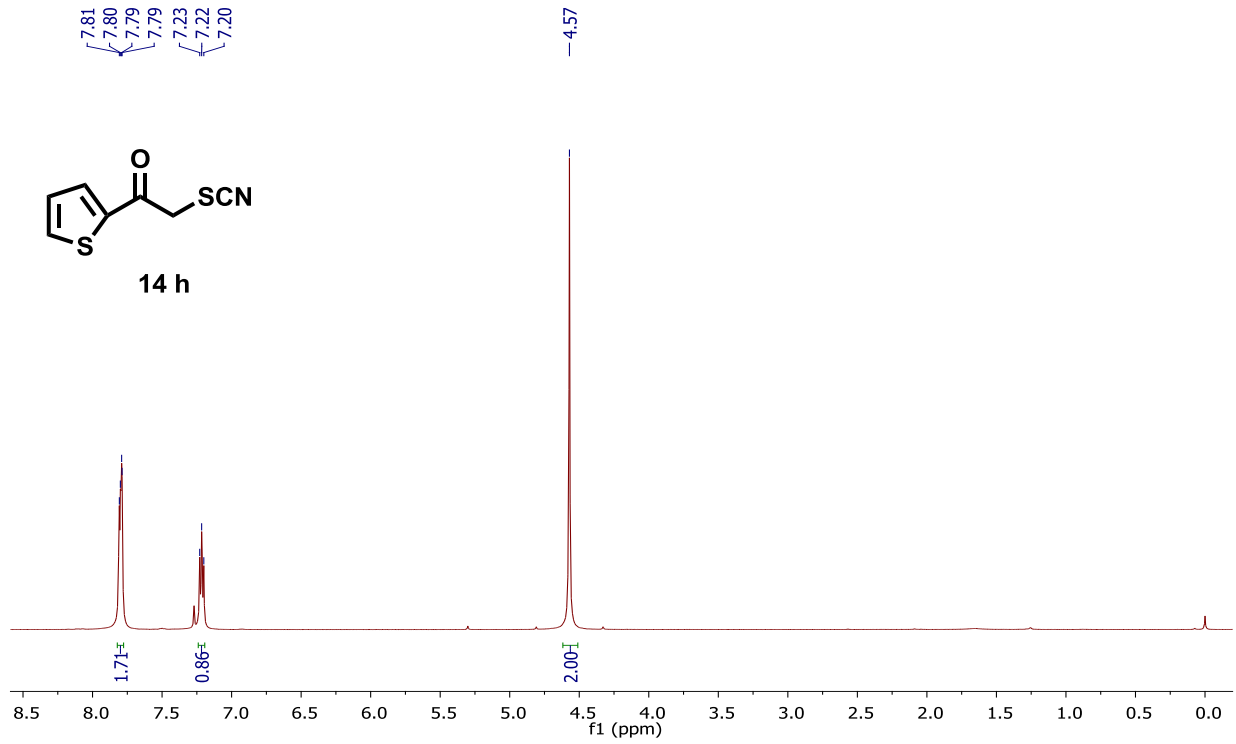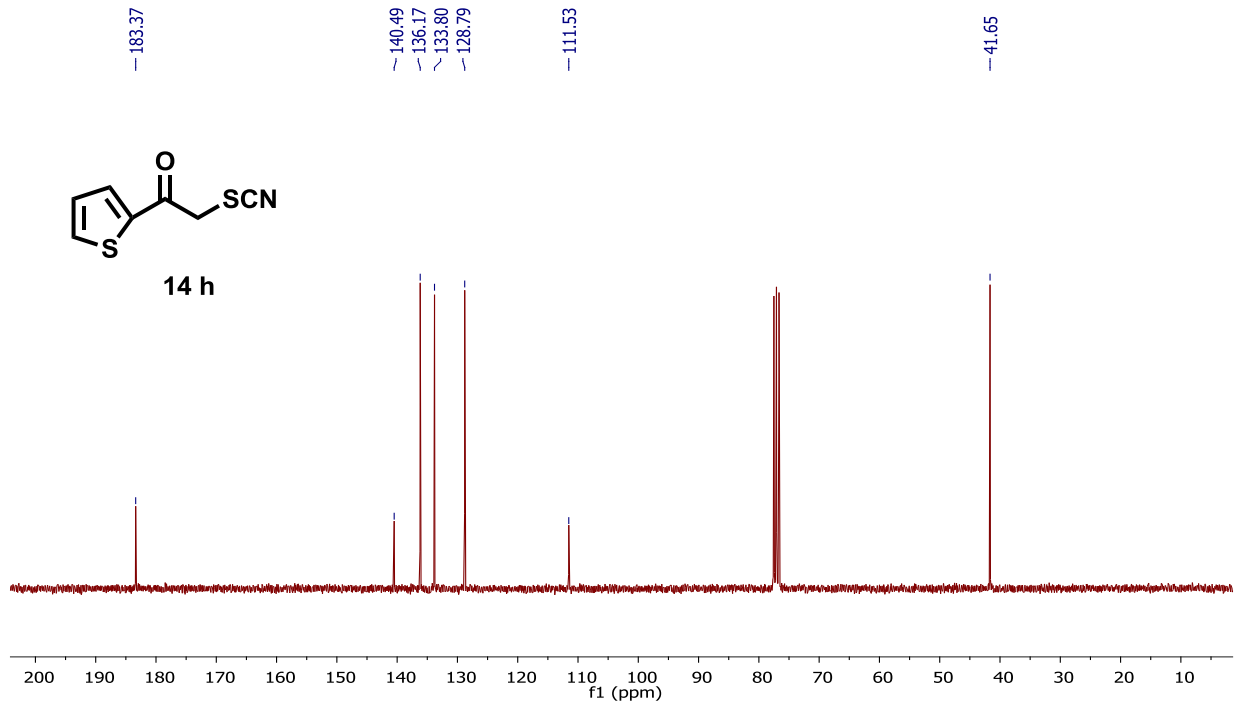

# 2-Azido-1-(4-chlorophenyl)ethanone

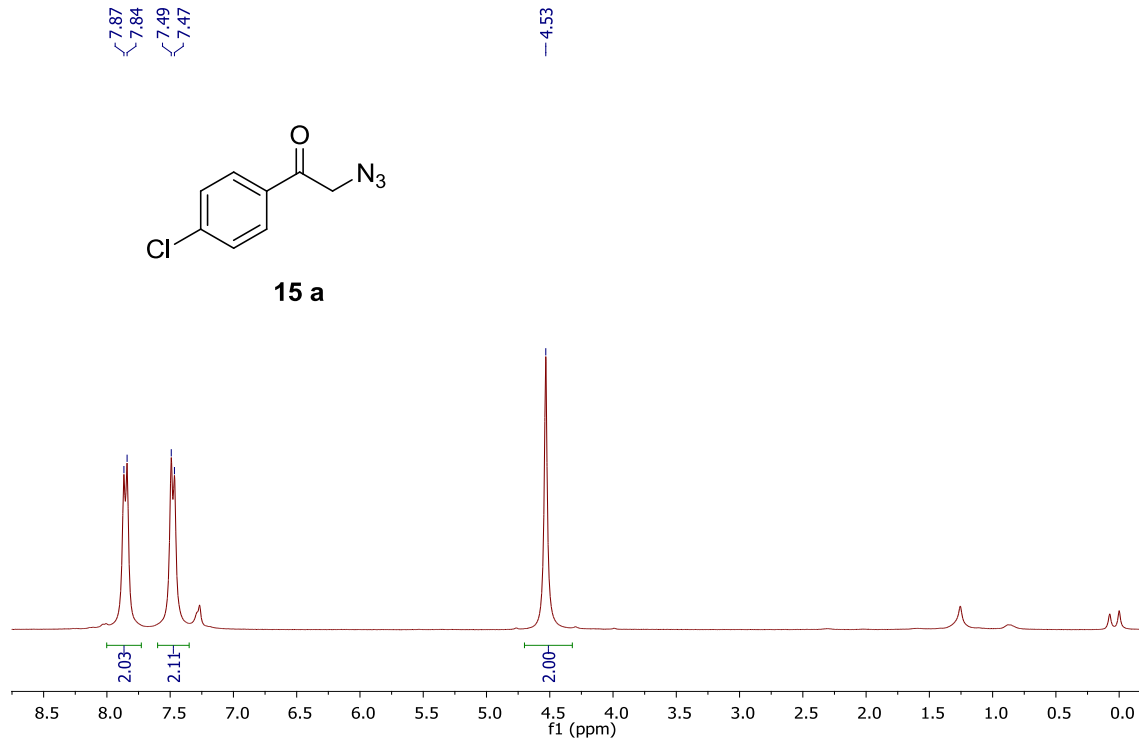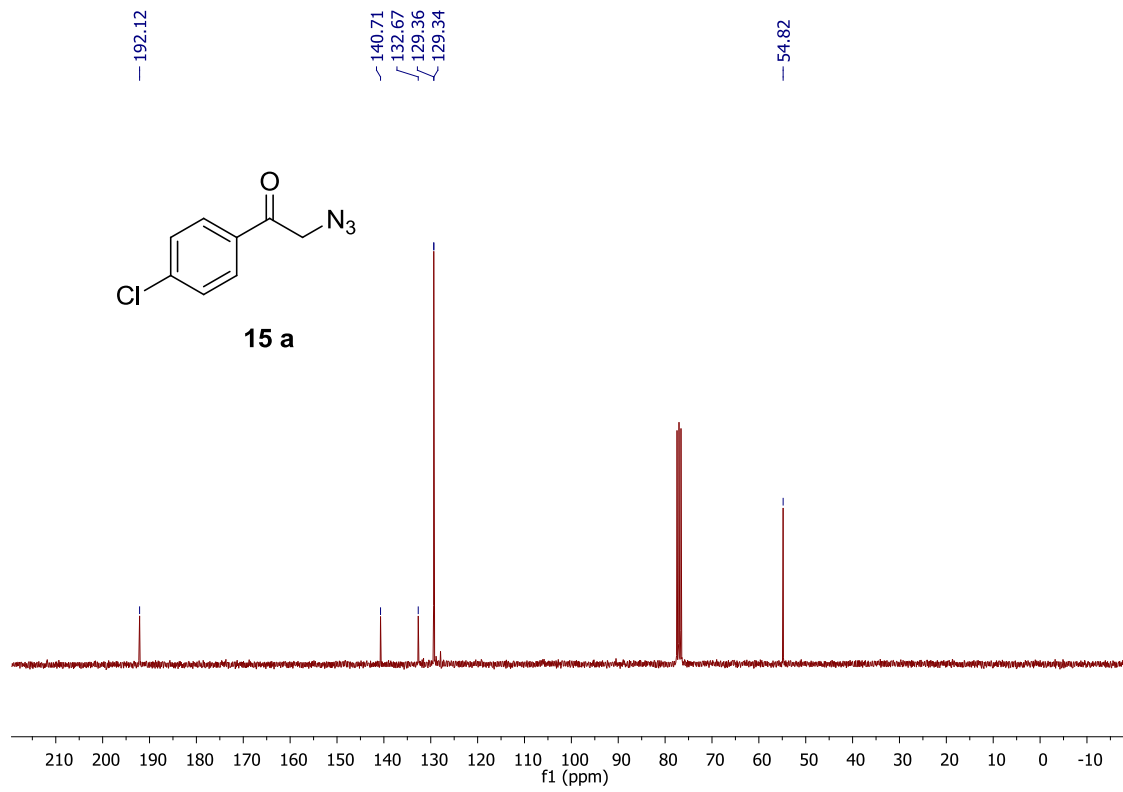

# 2-Azido-1-(3-chlorophenyl)ethanone

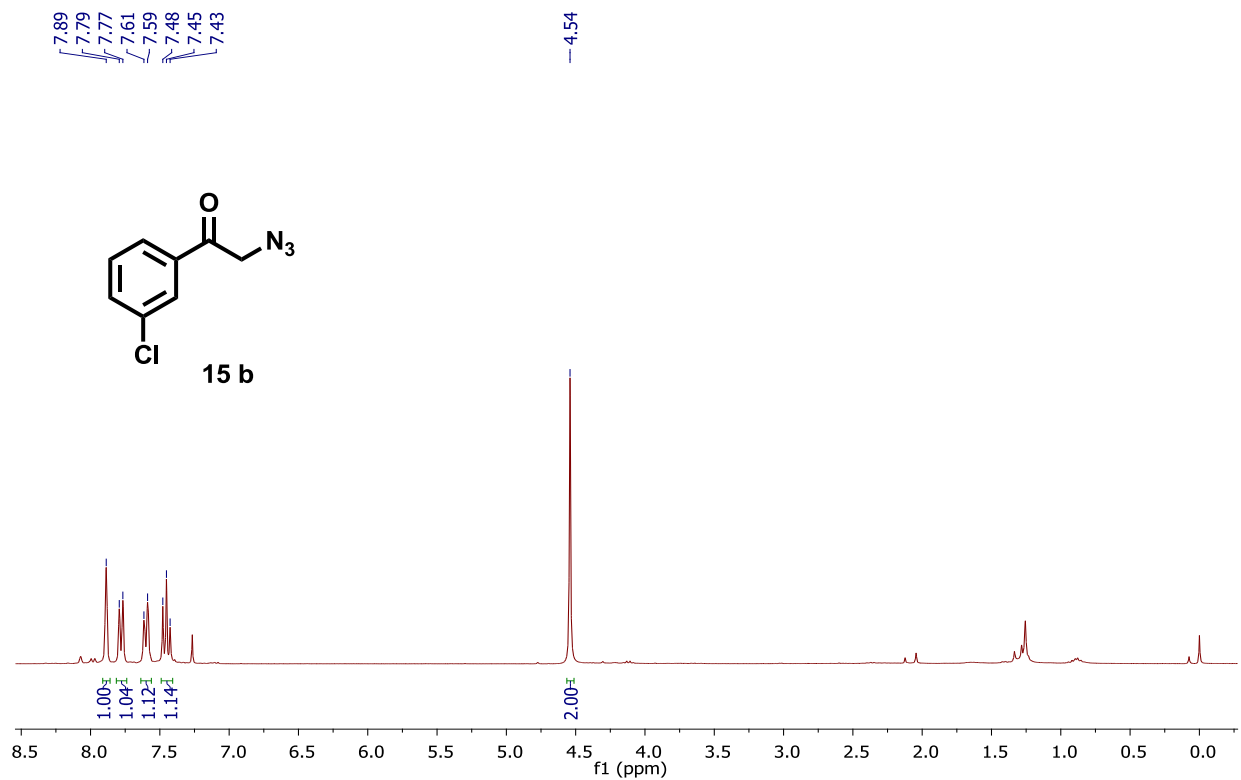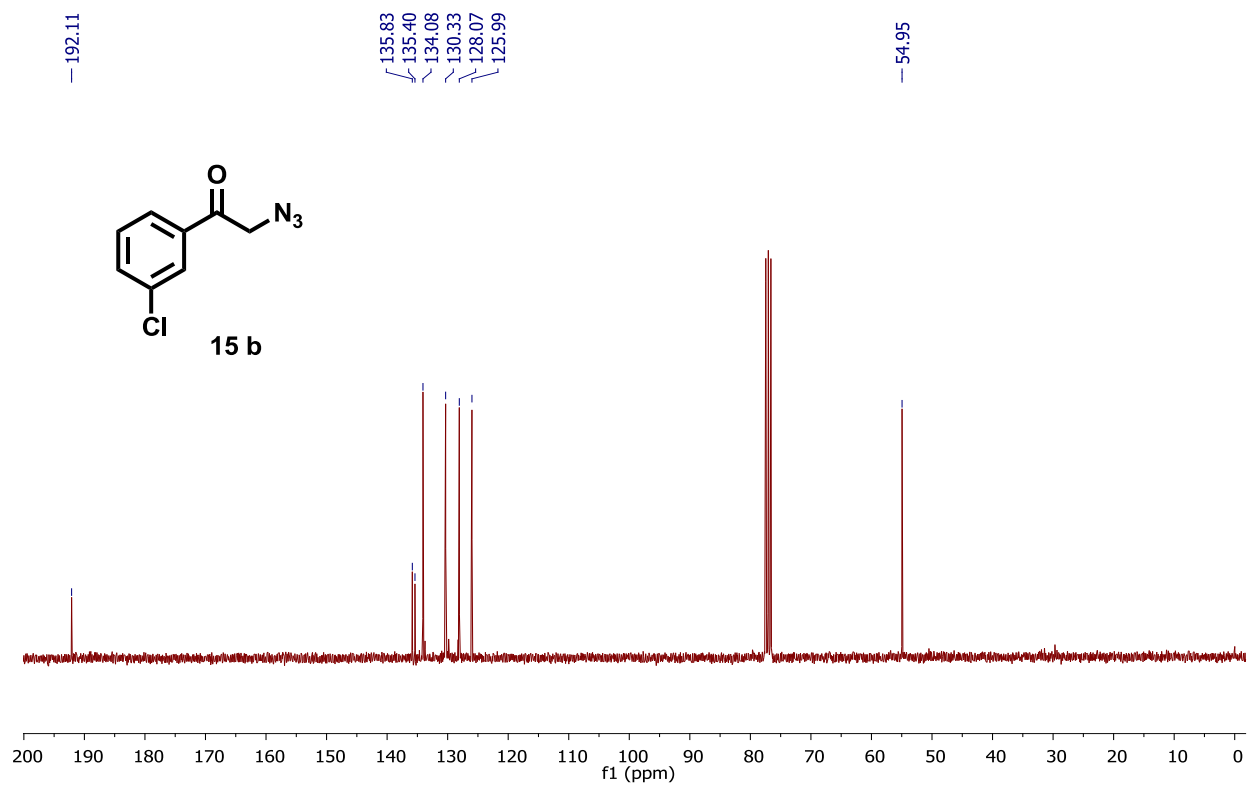

# 2-Azido-1-(4-bromophenyl)ethanone

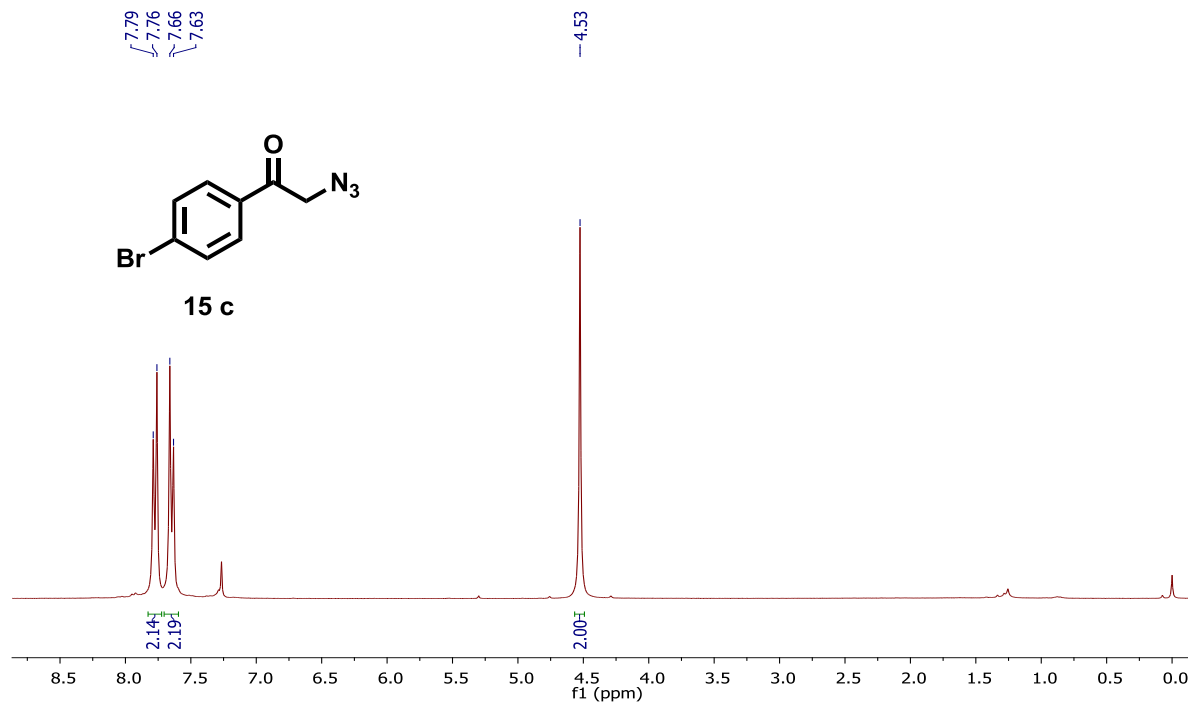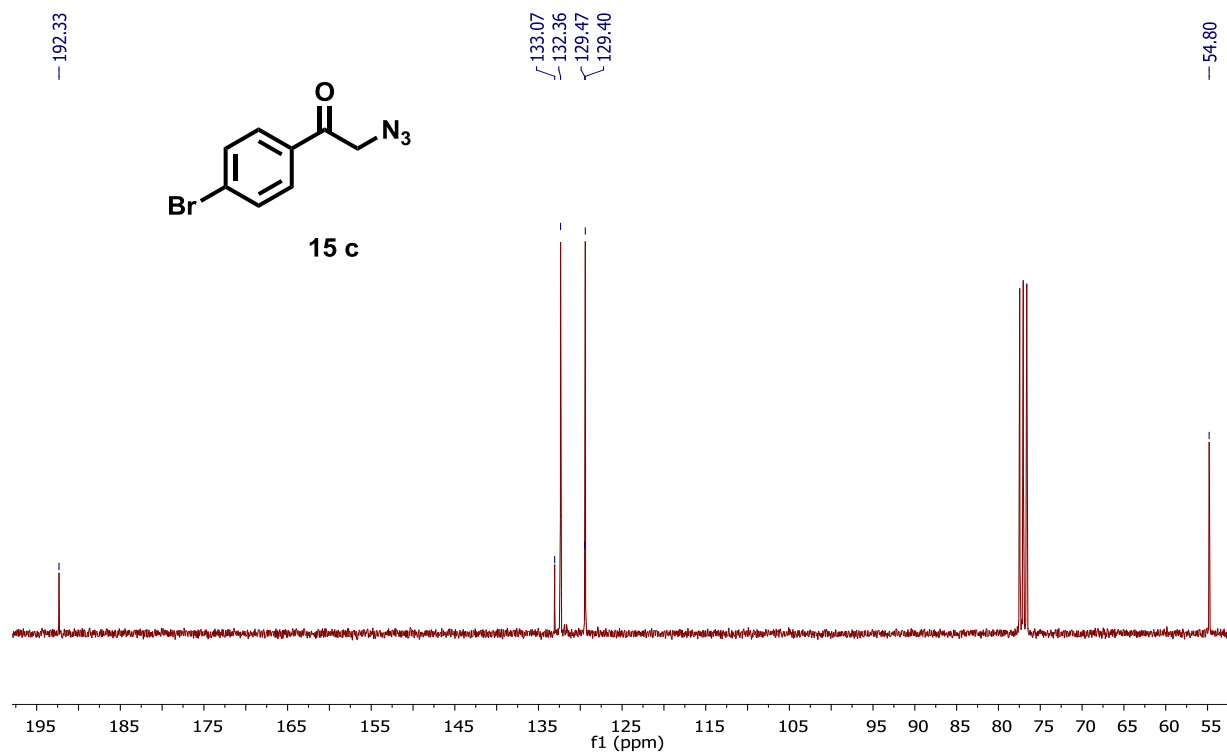

# 2-Azido-1-*p*-tolyl ethanone

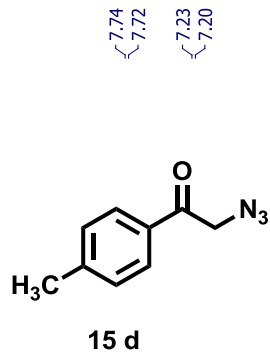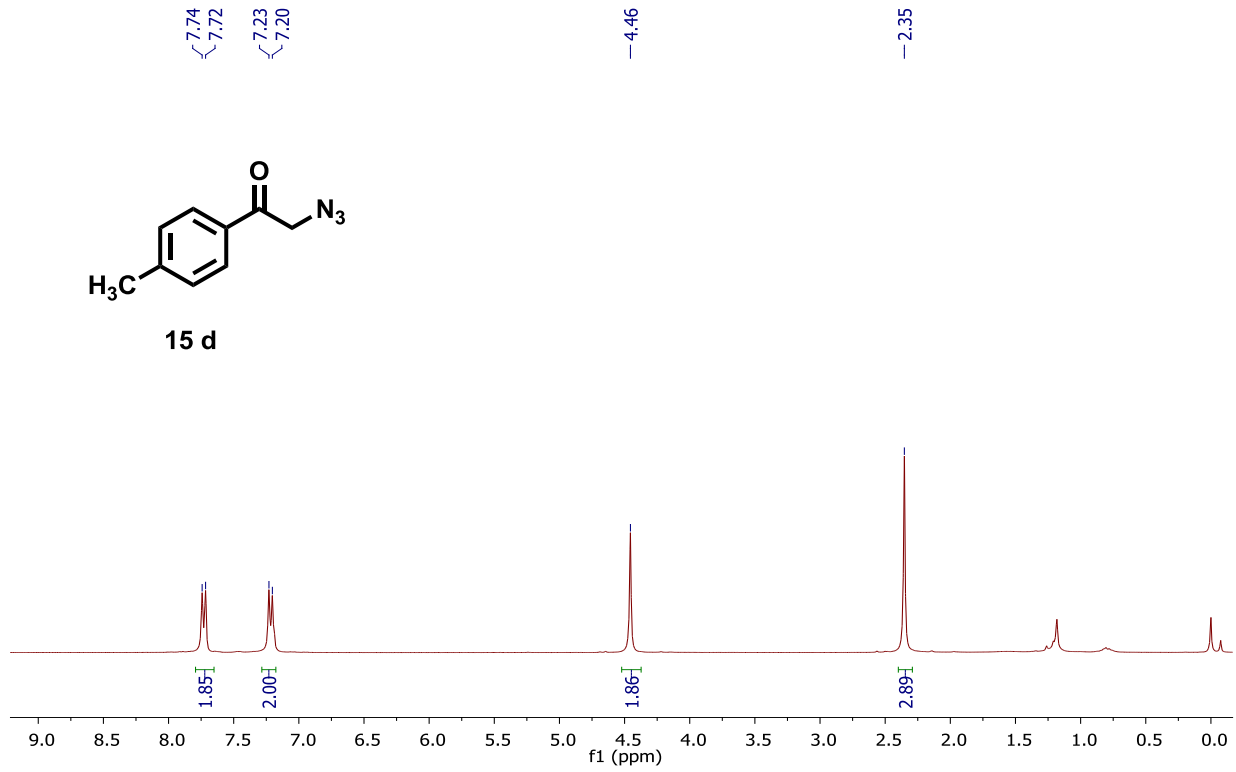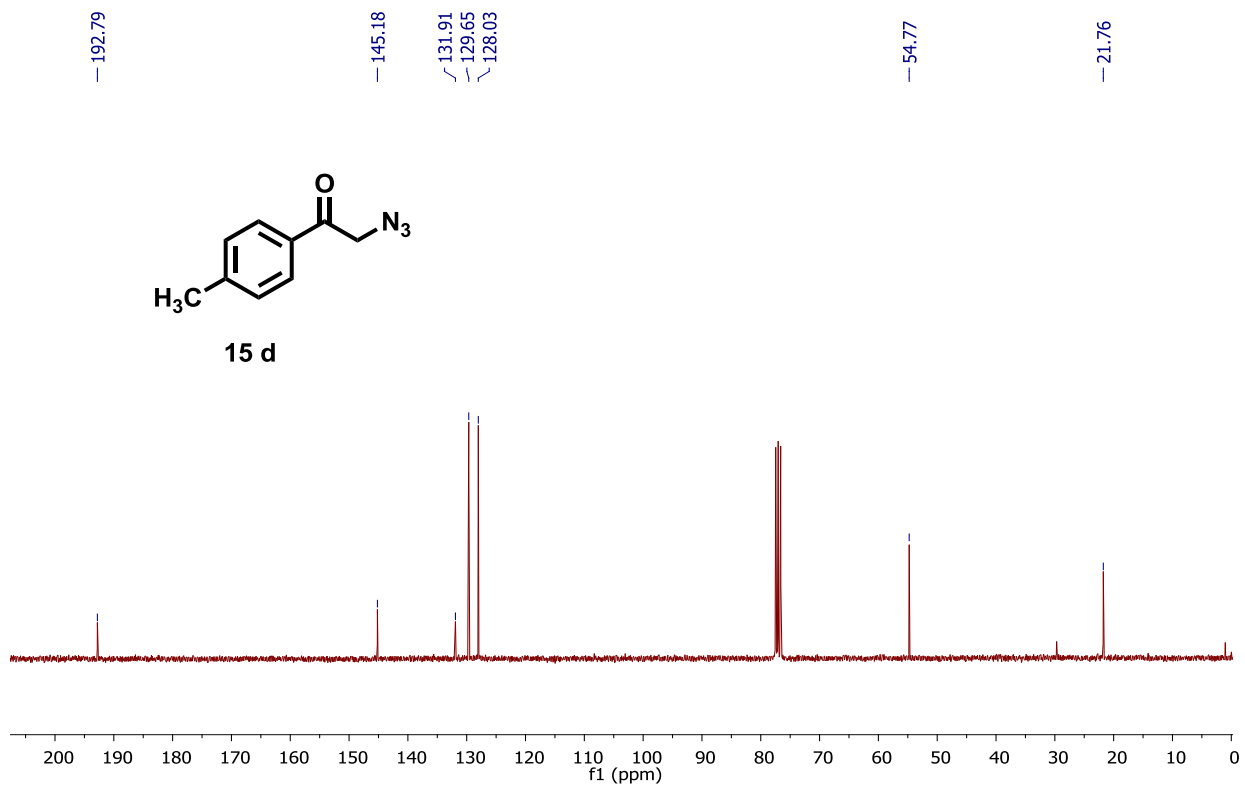

# 2-Azido-1-(4-methoxyphenyl)ethanone

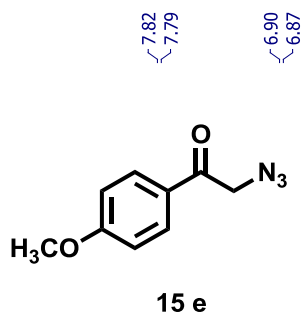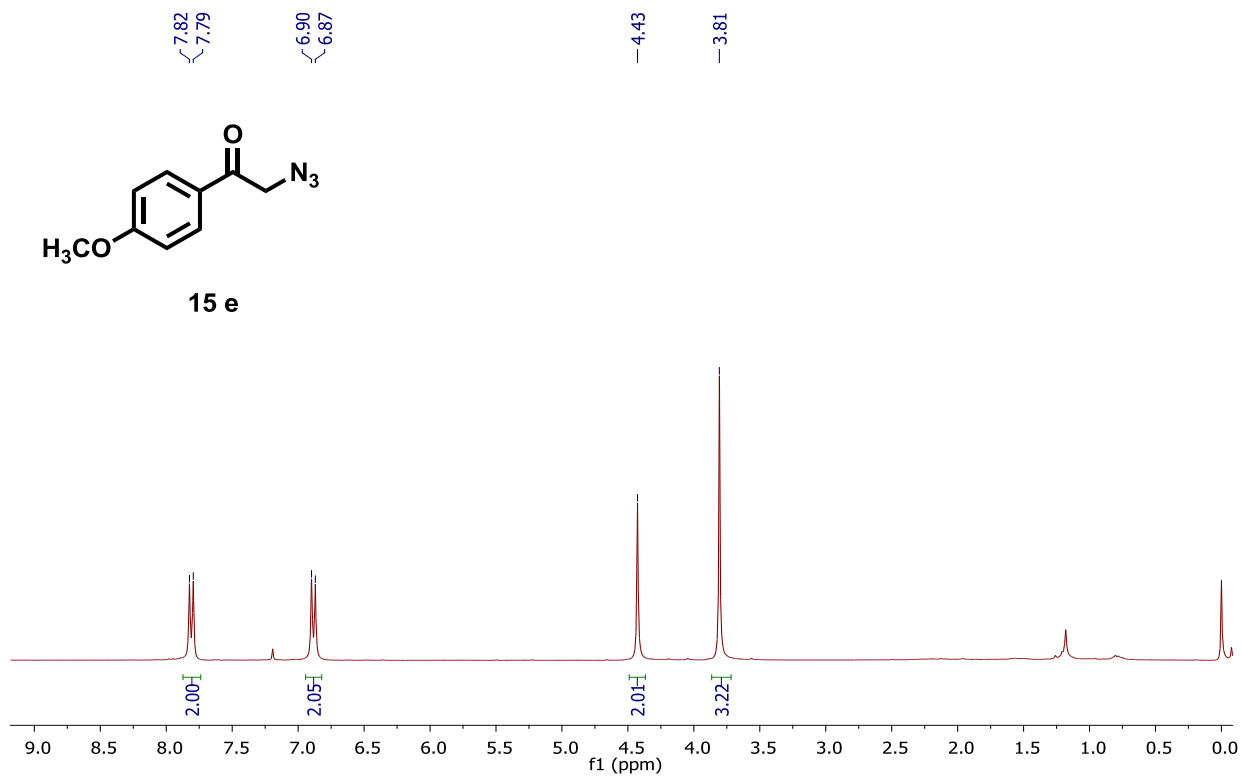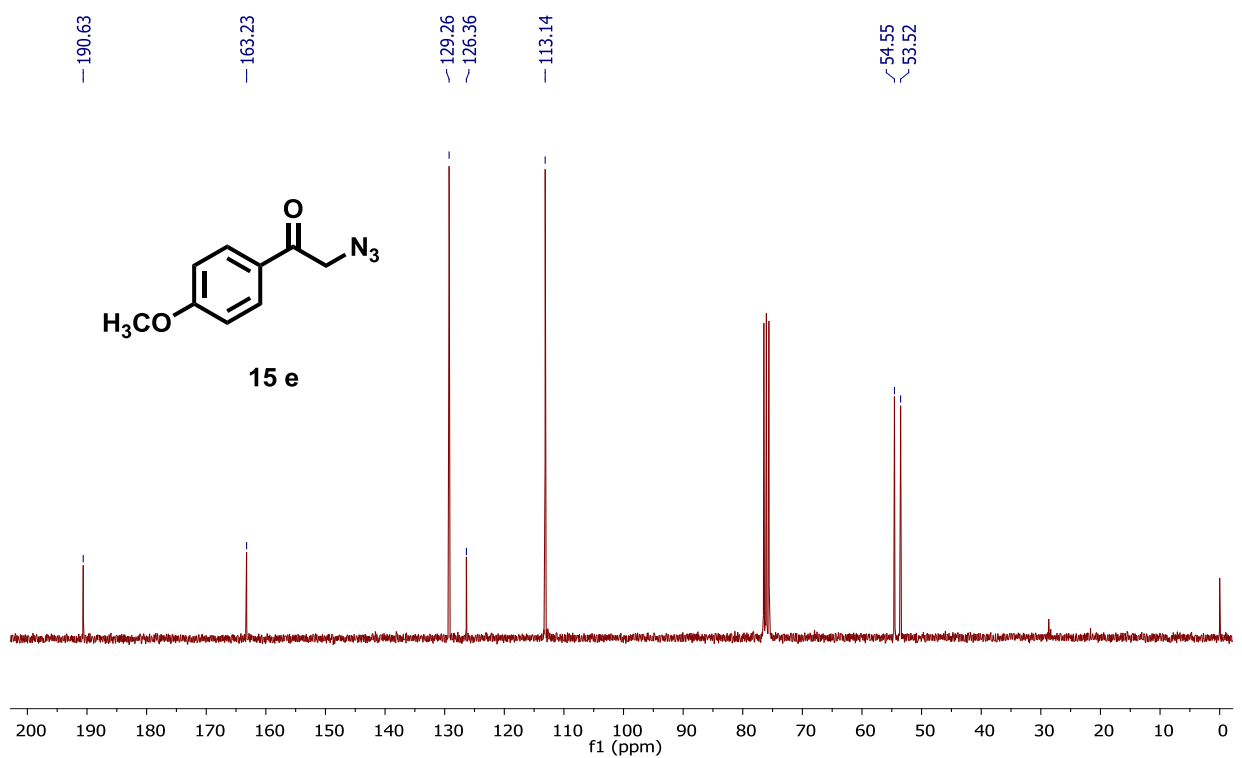

# 2-Azido-1-(naphthalene-2-yl)ethanone

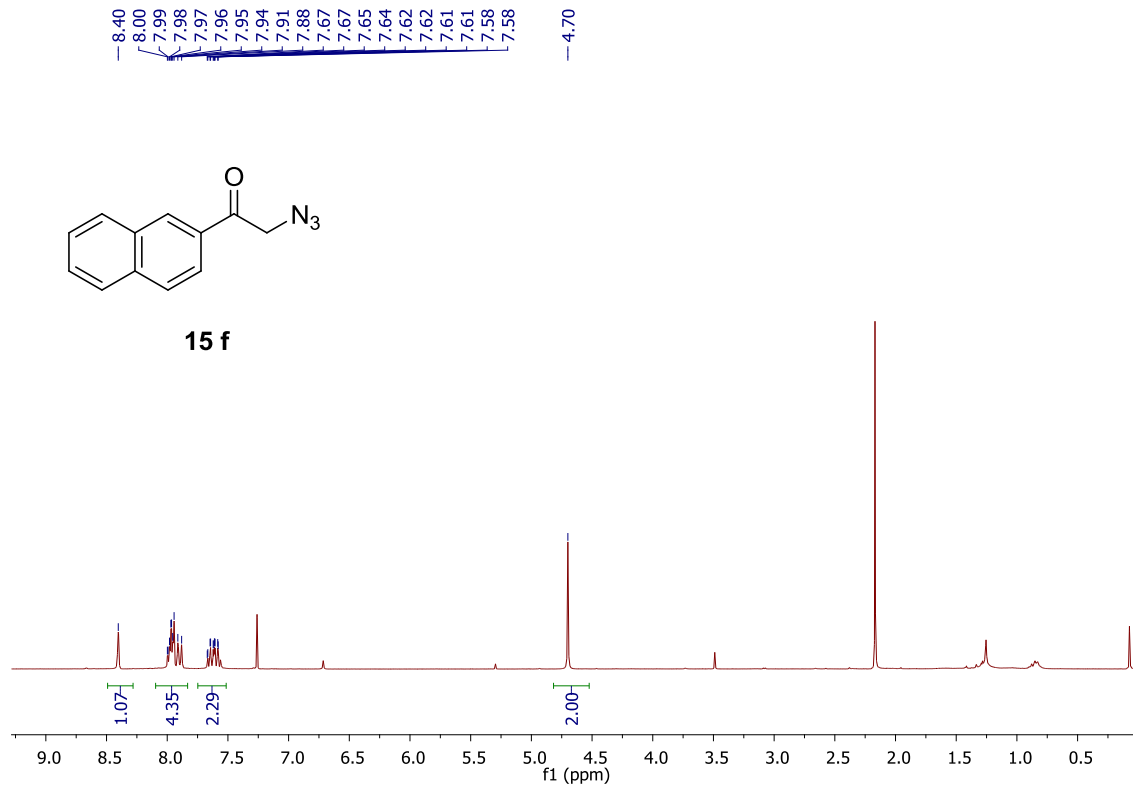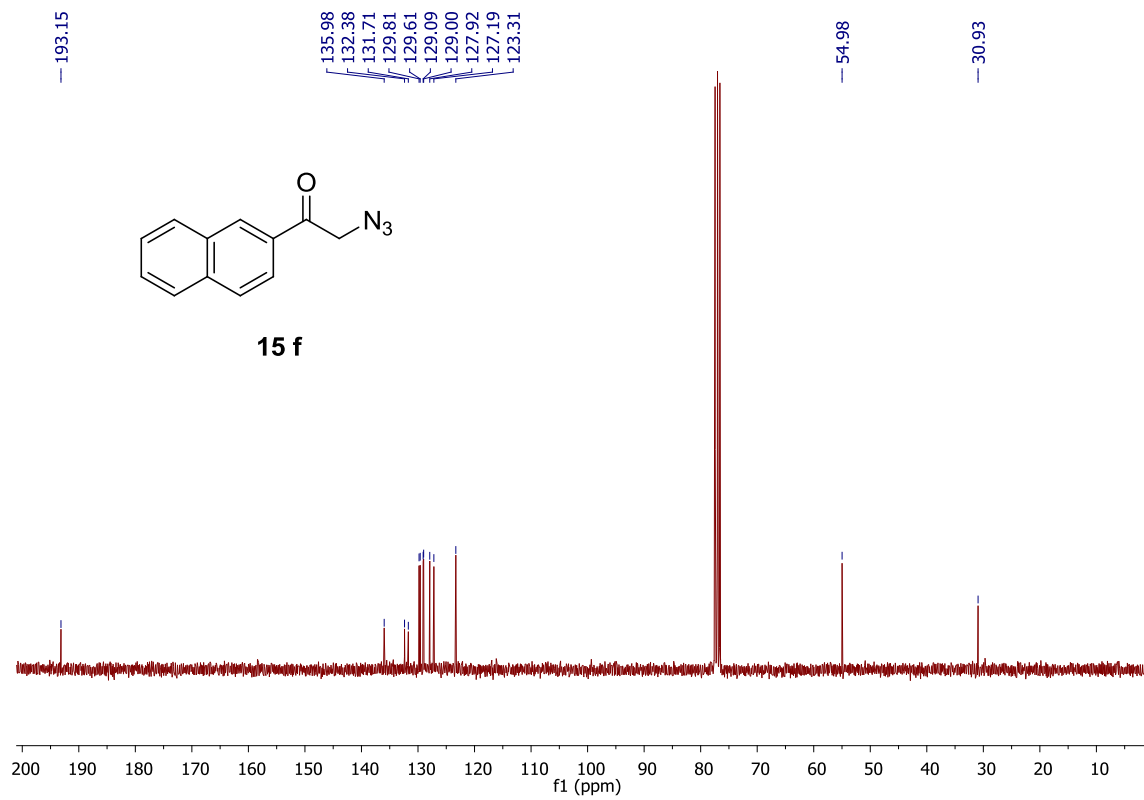



# 2-Azido-1-(4-nitrophenyl)ethanone

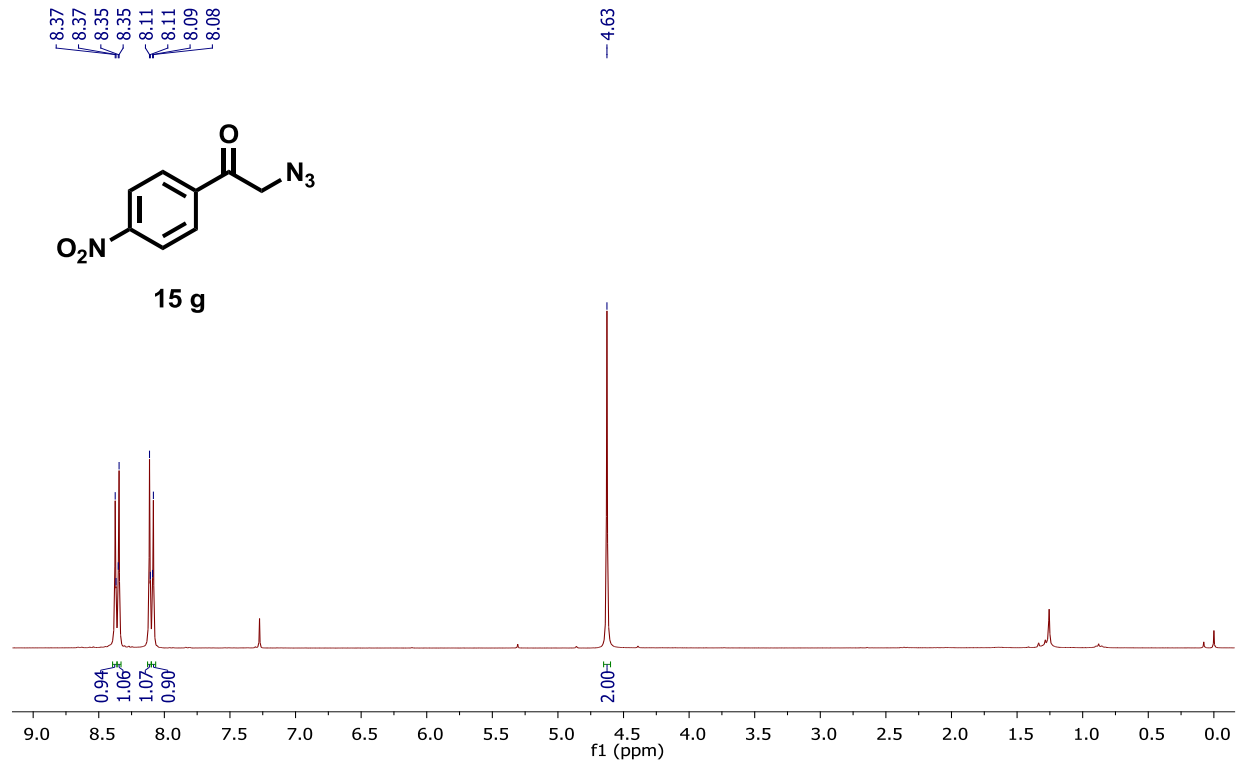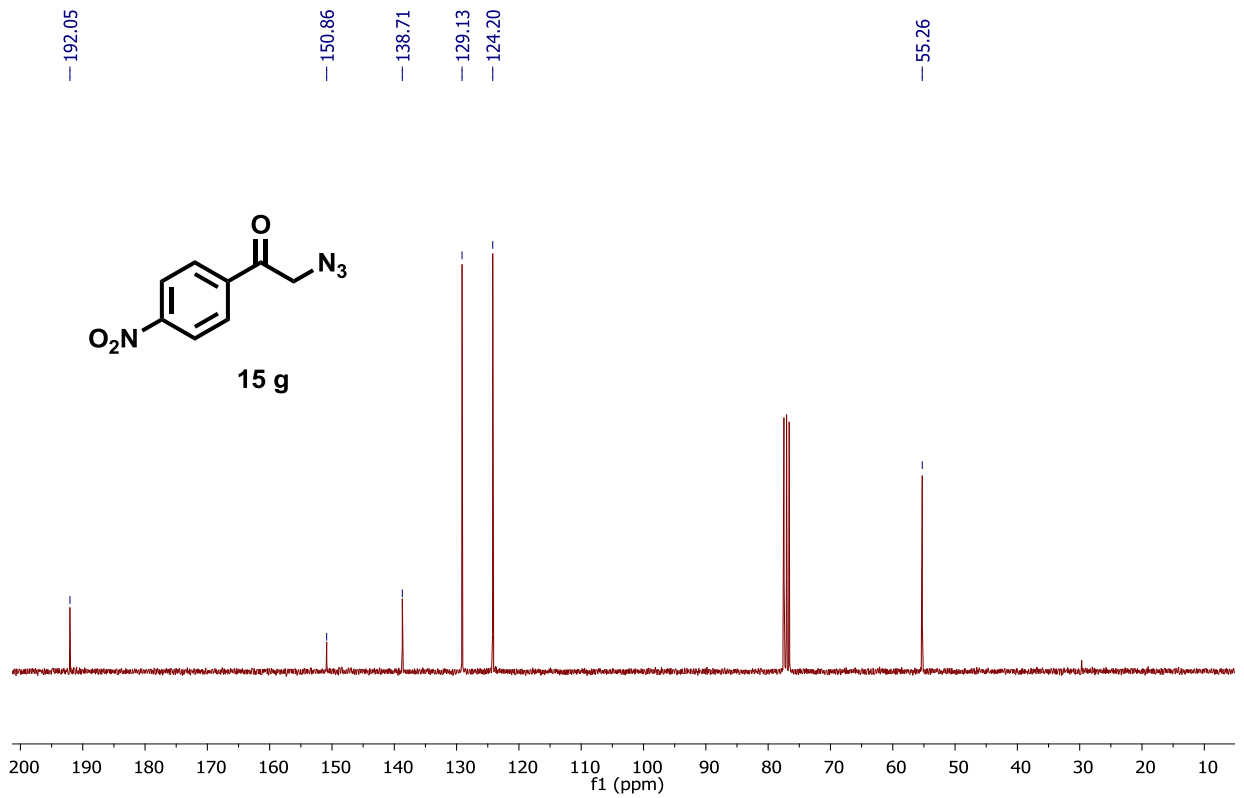

# 2-Azido-1-(thiophen-2-yl)ethanone

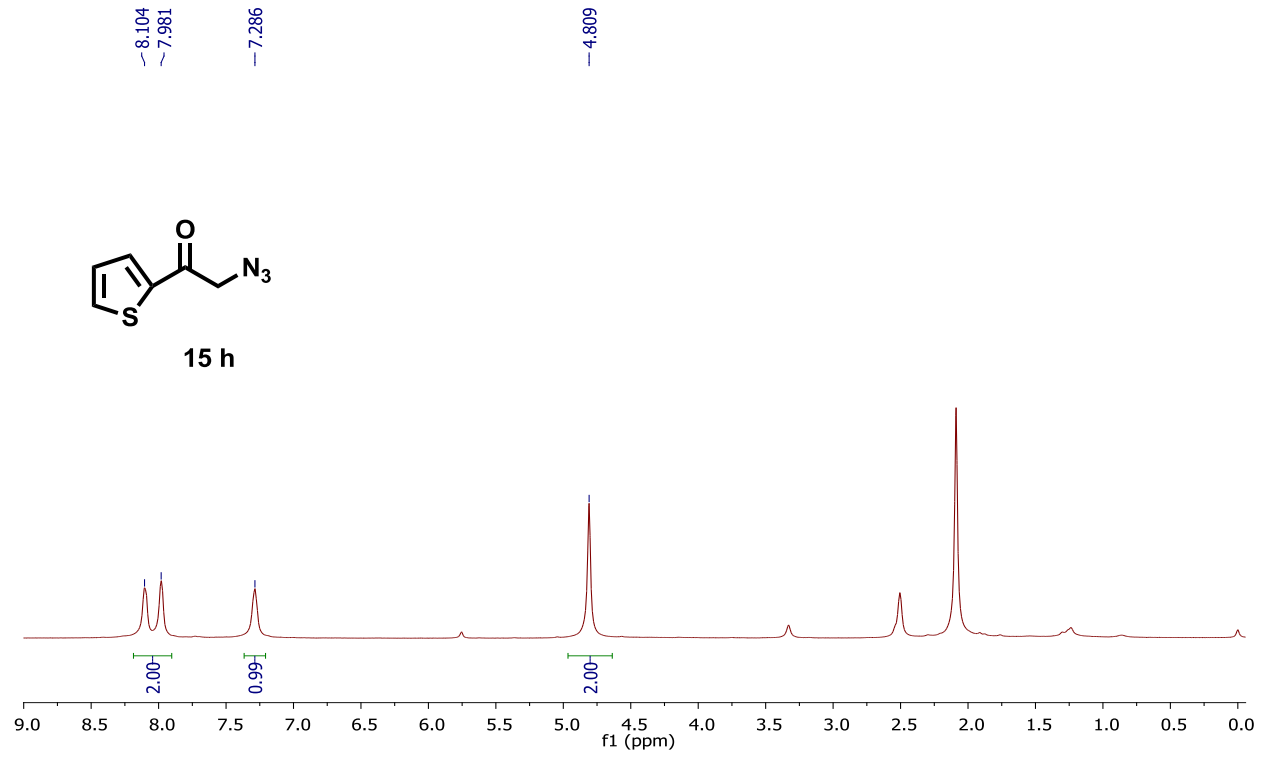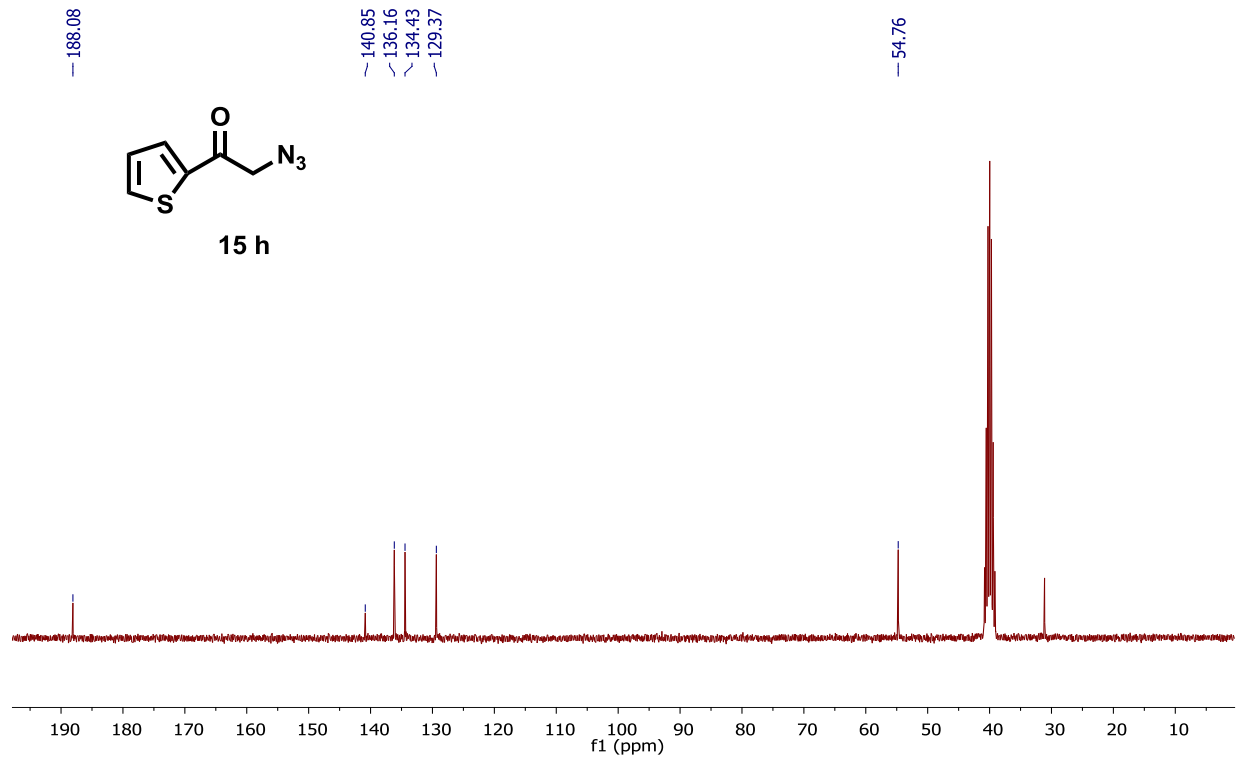

# 1-(4-Chlorophenyl)-2-tosylethanone

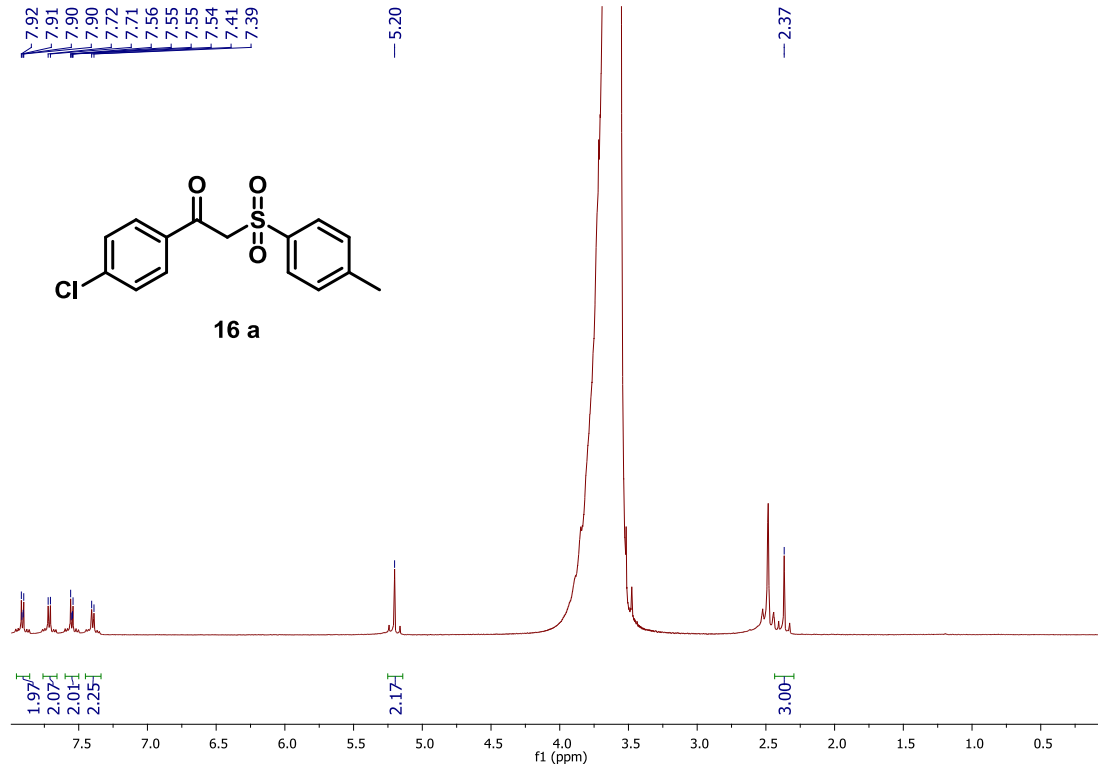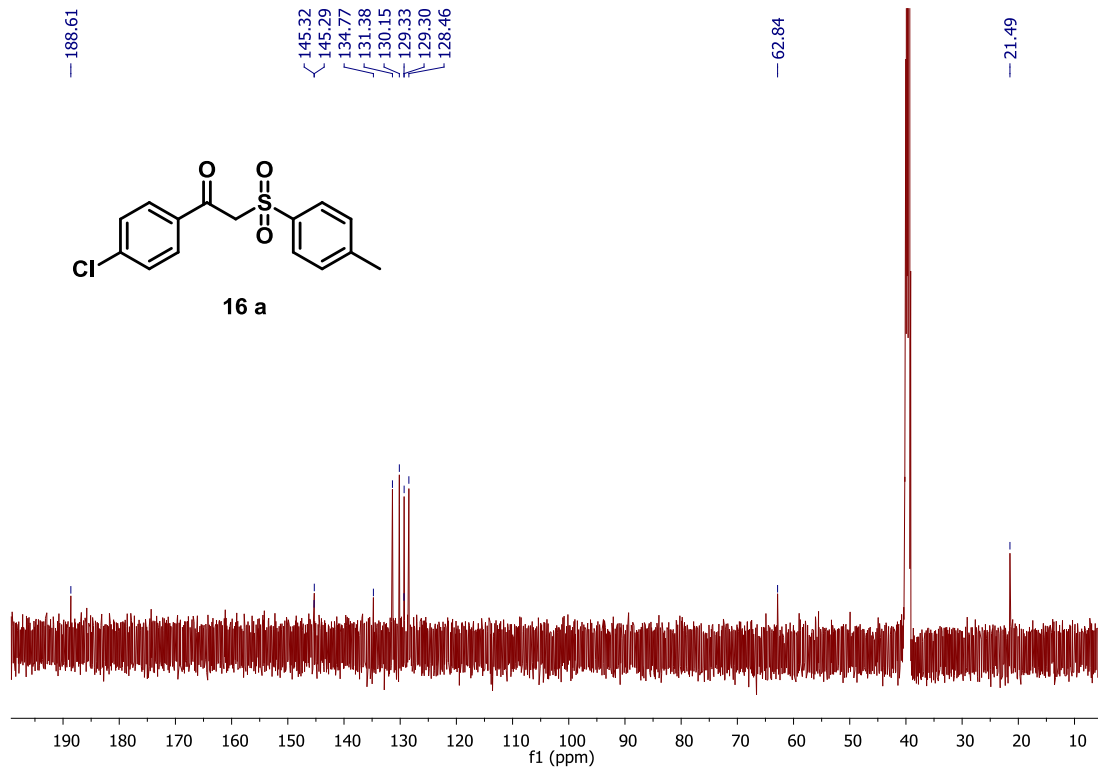

# 1-(4-Chlorophenyl)-2-tosylethanone

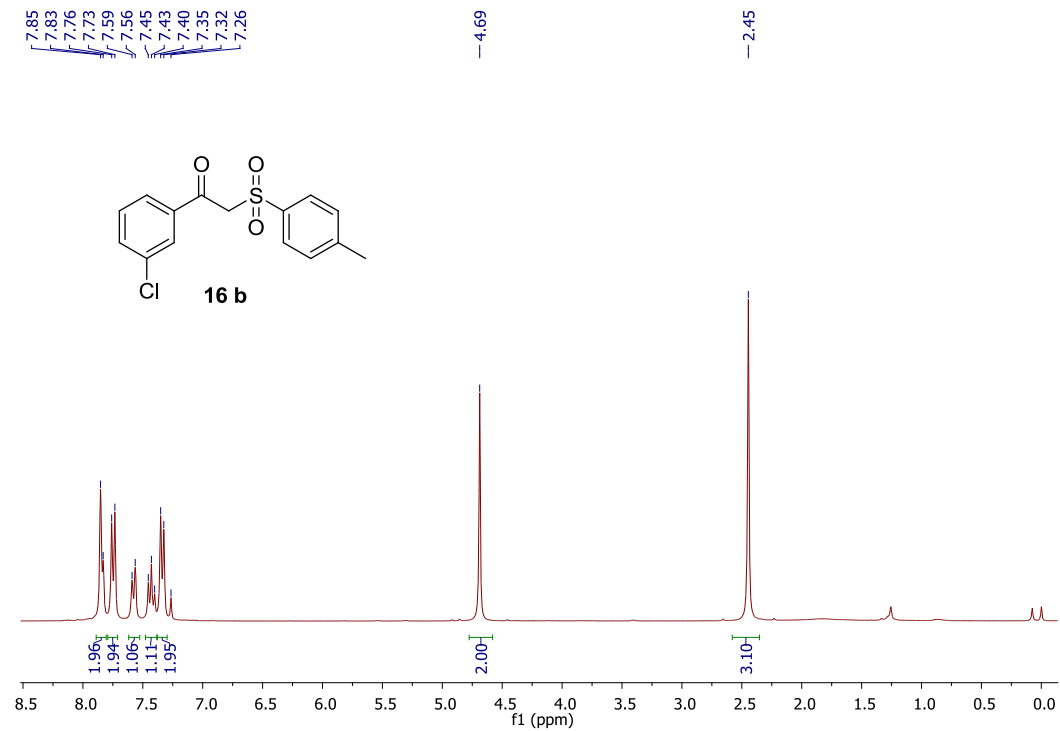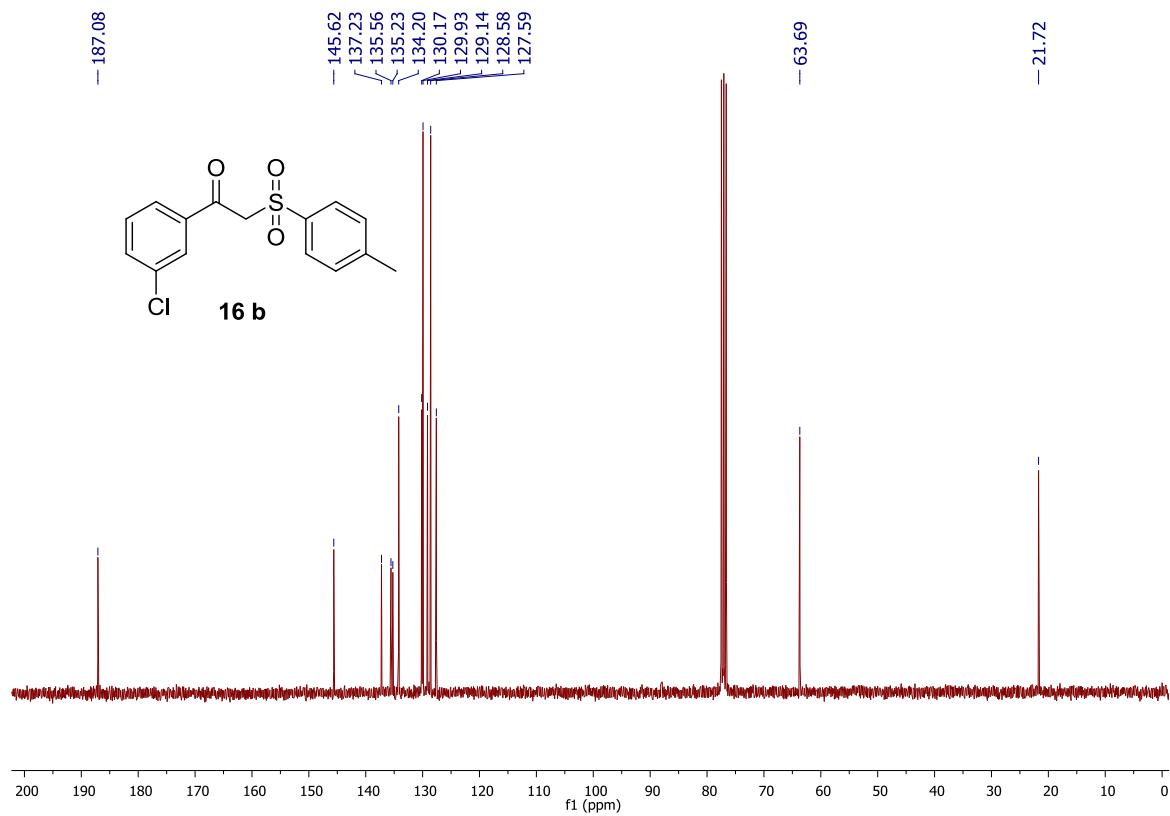

# 1-(4-Bromophenyl)-2-tosylethanone

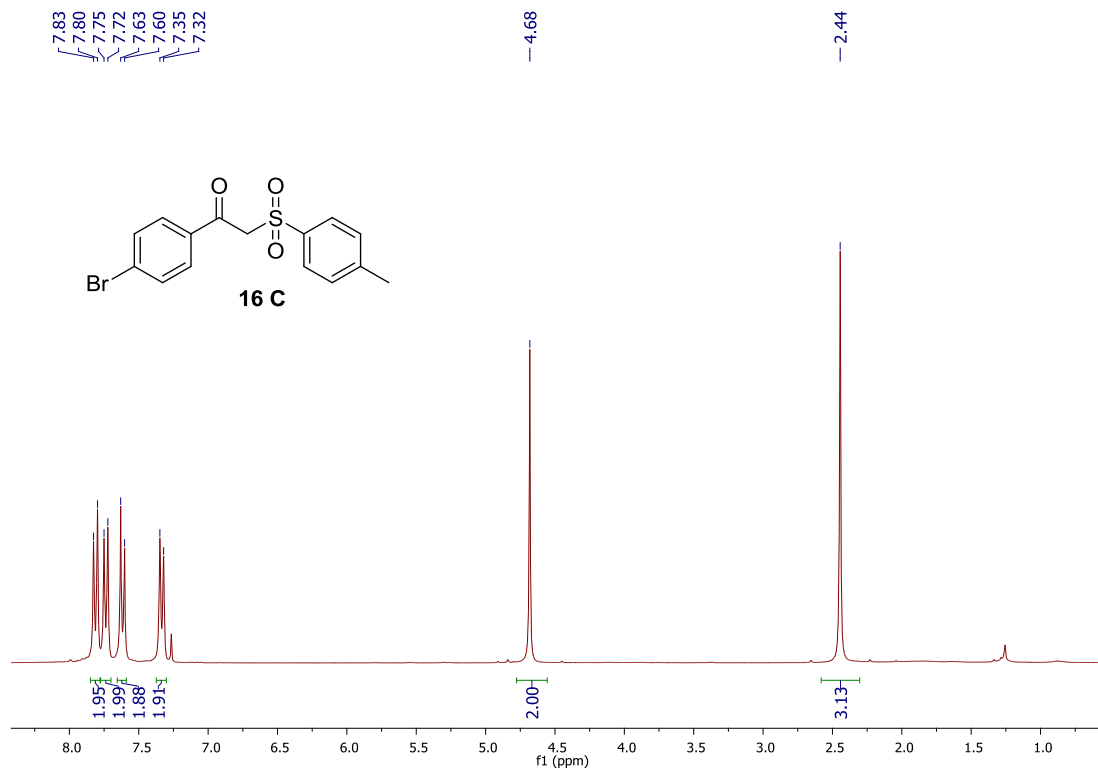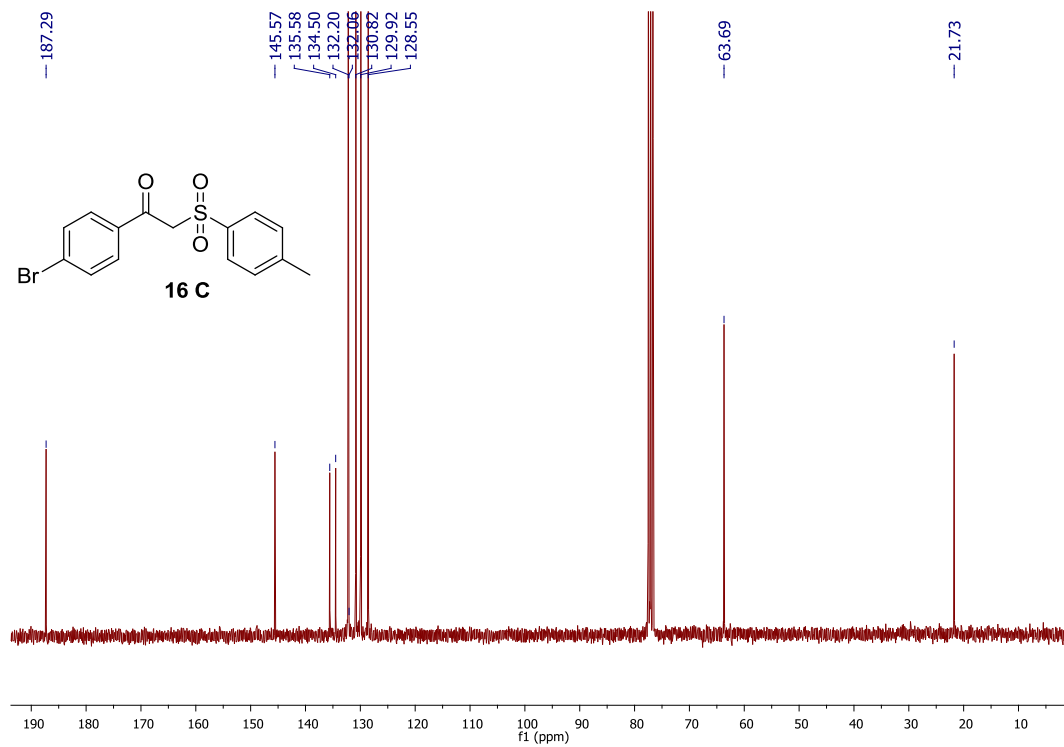

# 1-*p*-Tolyl-2-tosylethanone

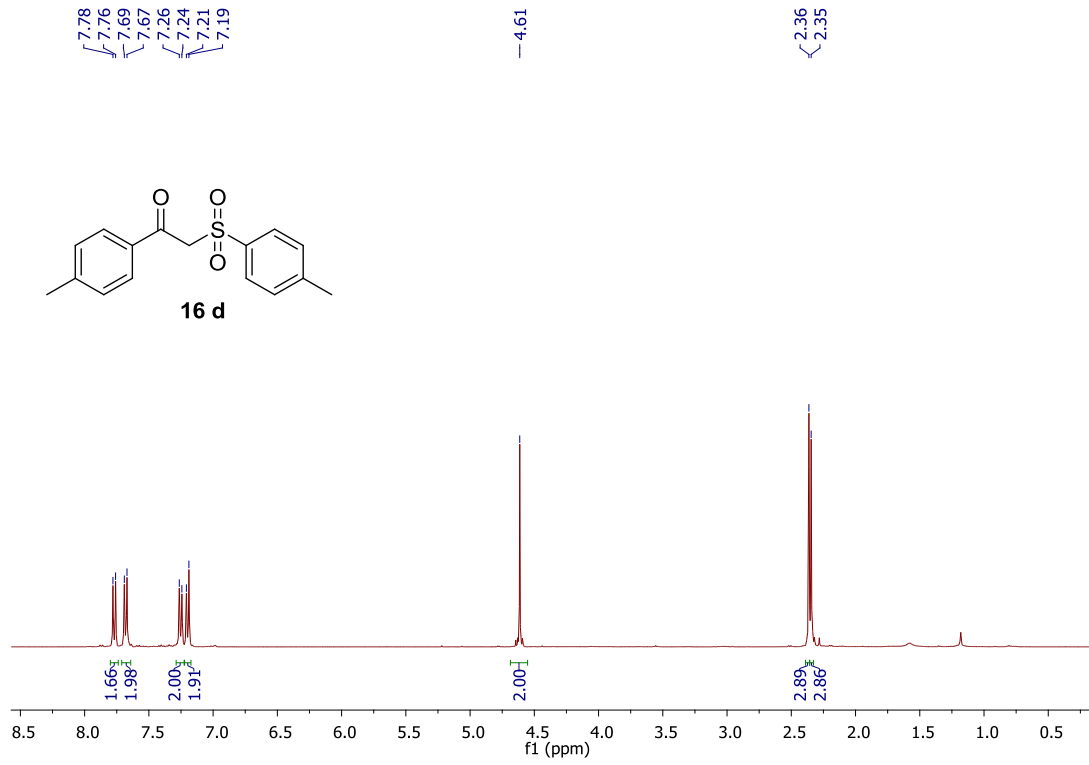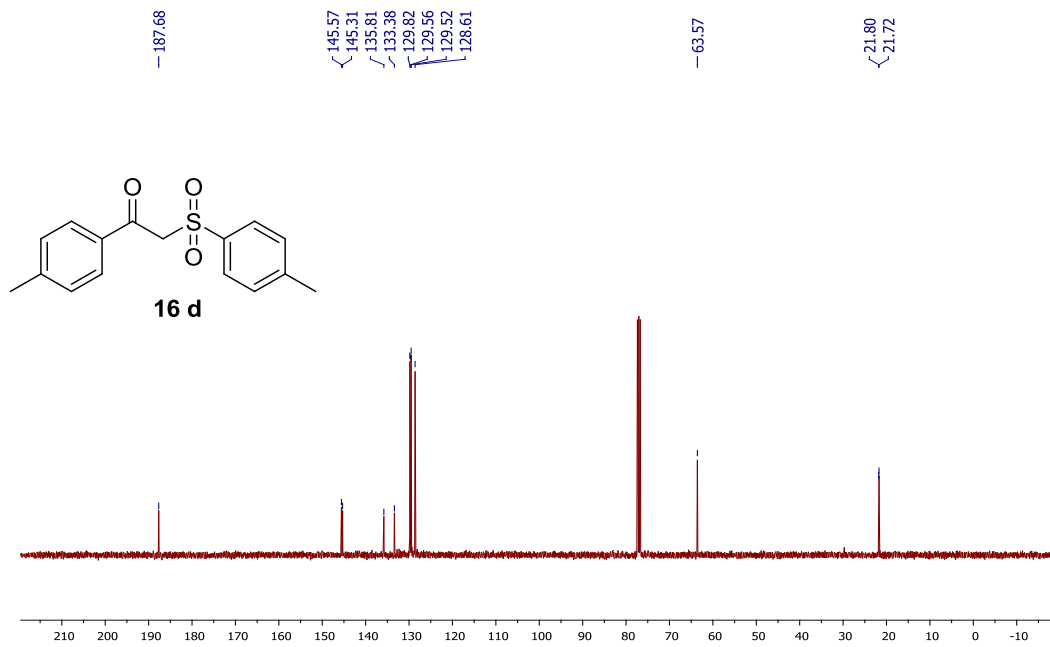

# 1-(4-Methoxyphenyl)-2-tosylethanone

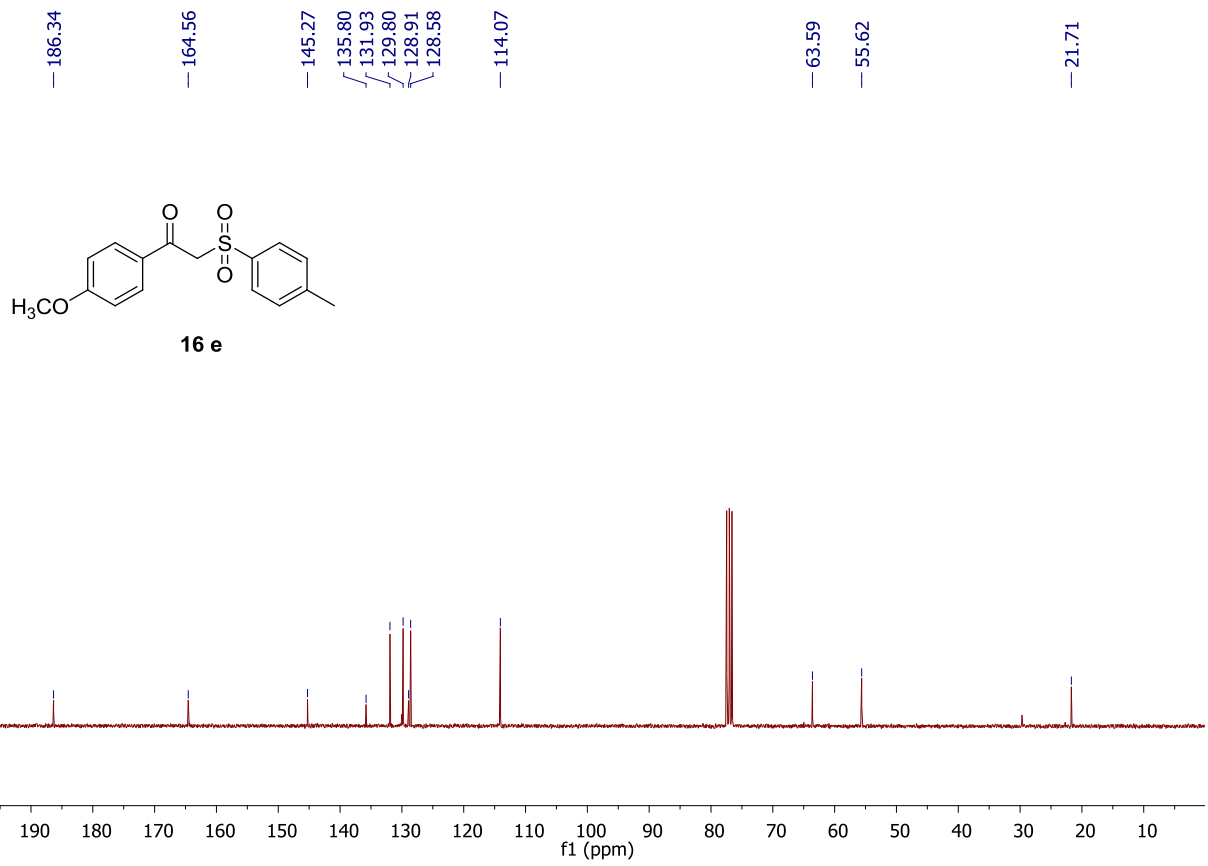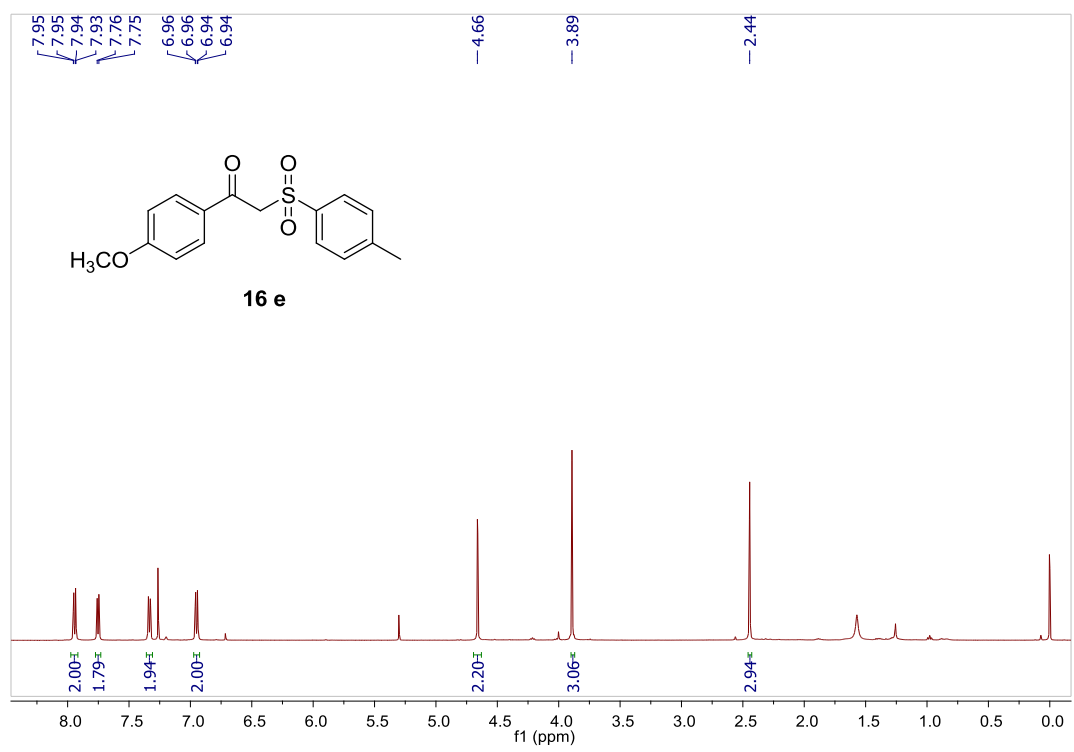

1-(Naphthene2-yl)-2-tosylethanone

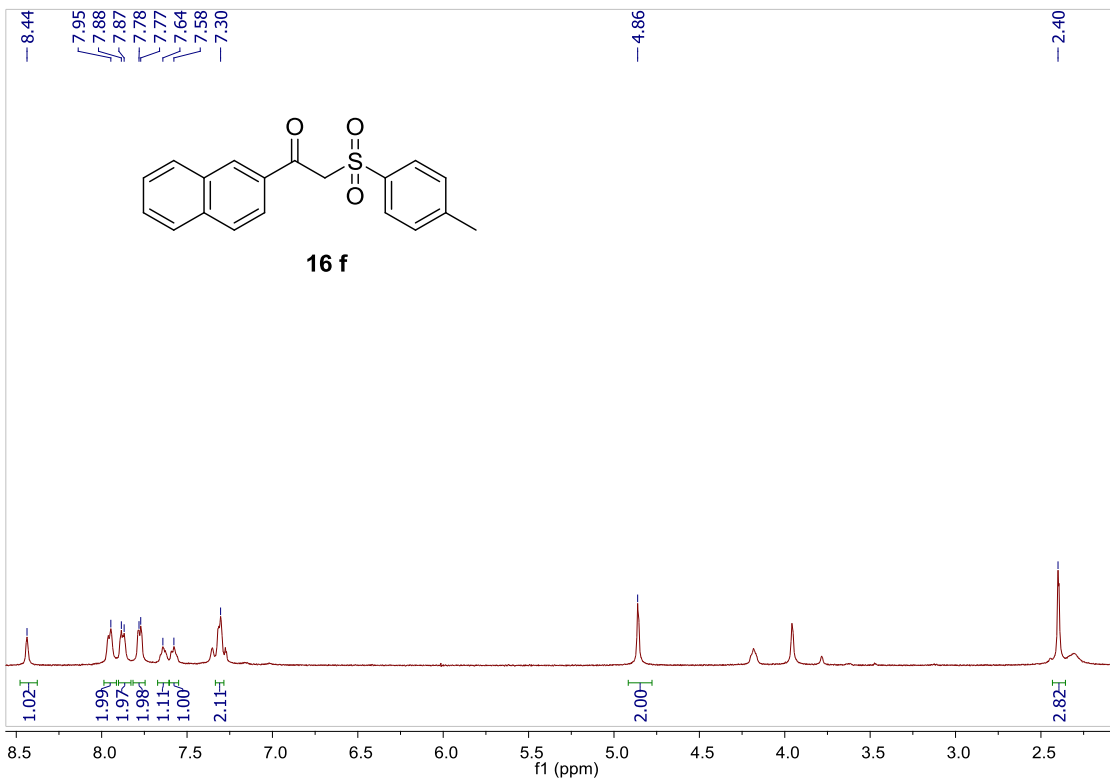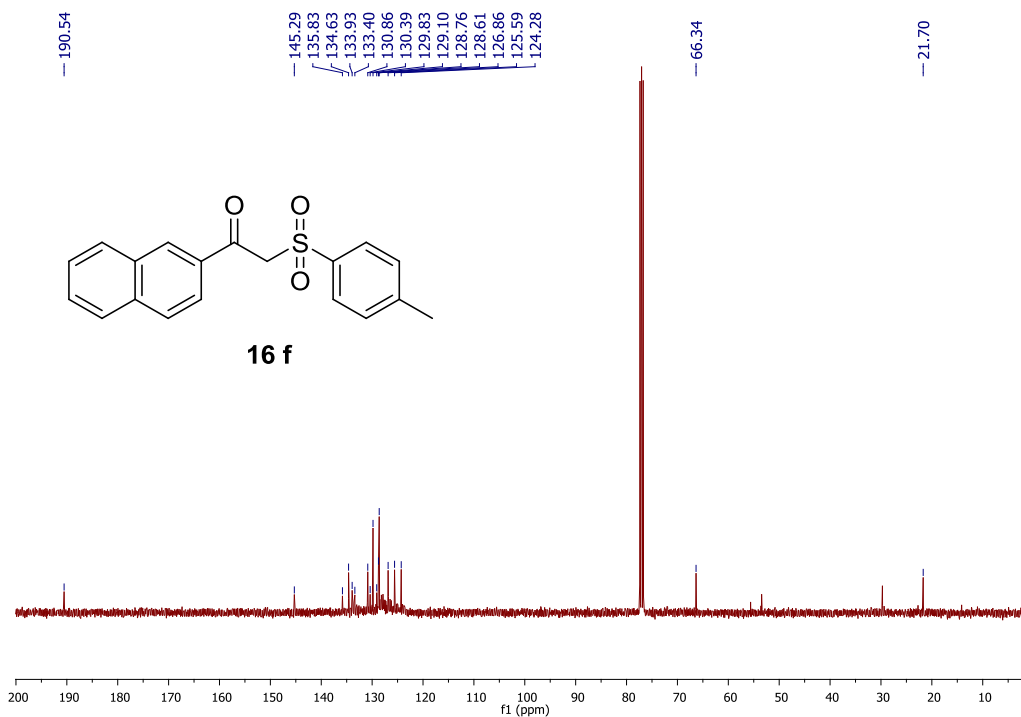



# 1-(4-Nitrophenyl)-2-tosylethanone

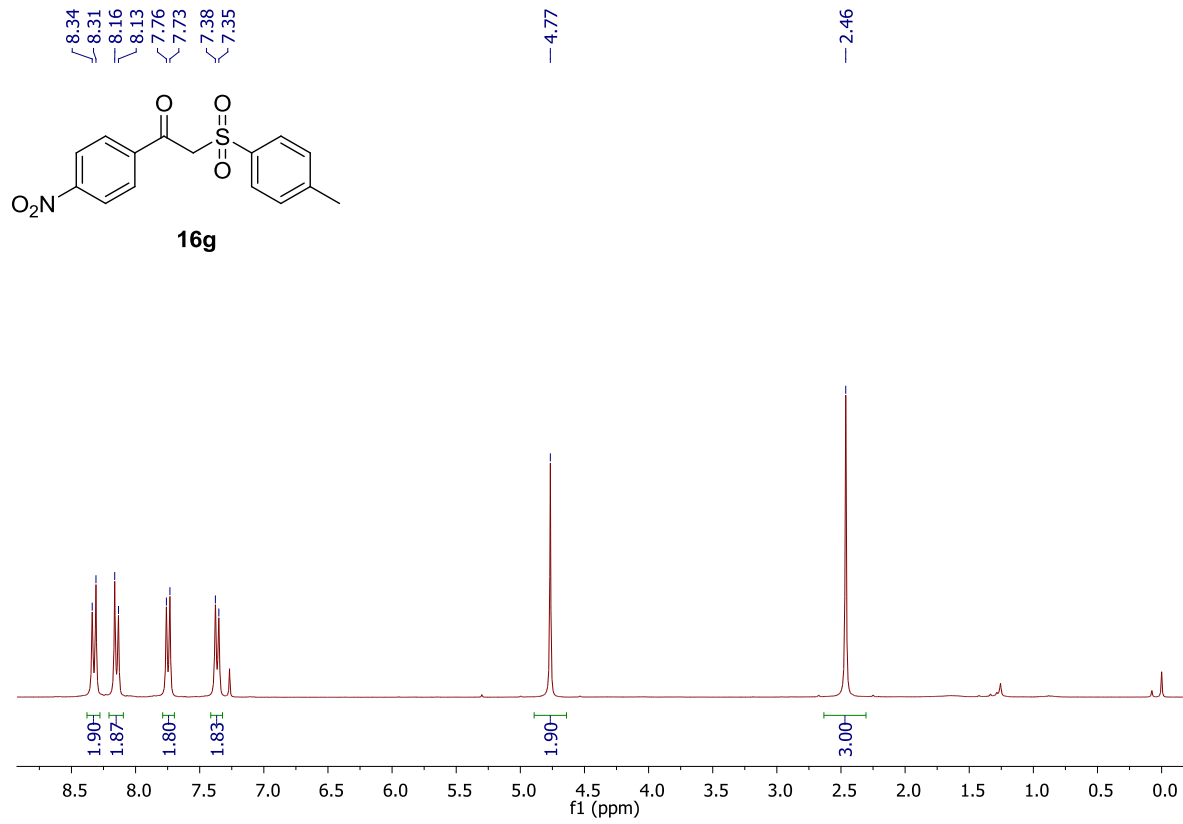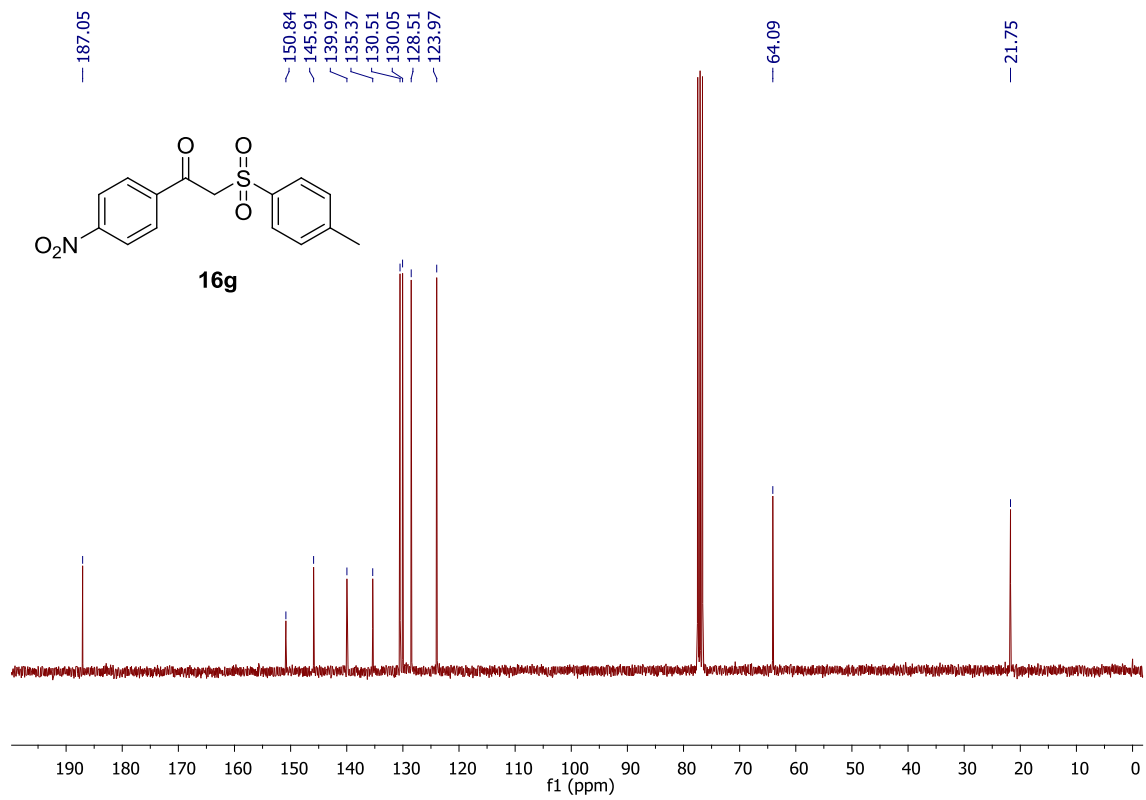

# 1-(Thiophen-2-yl)-2-tosylethanone

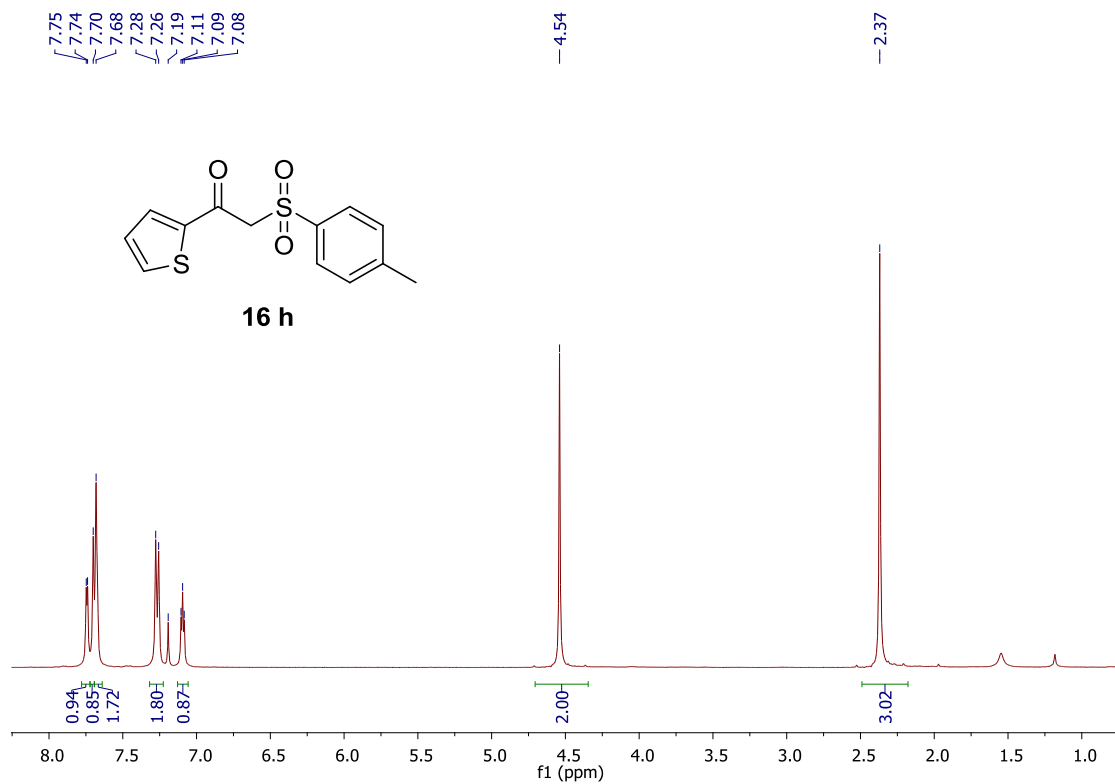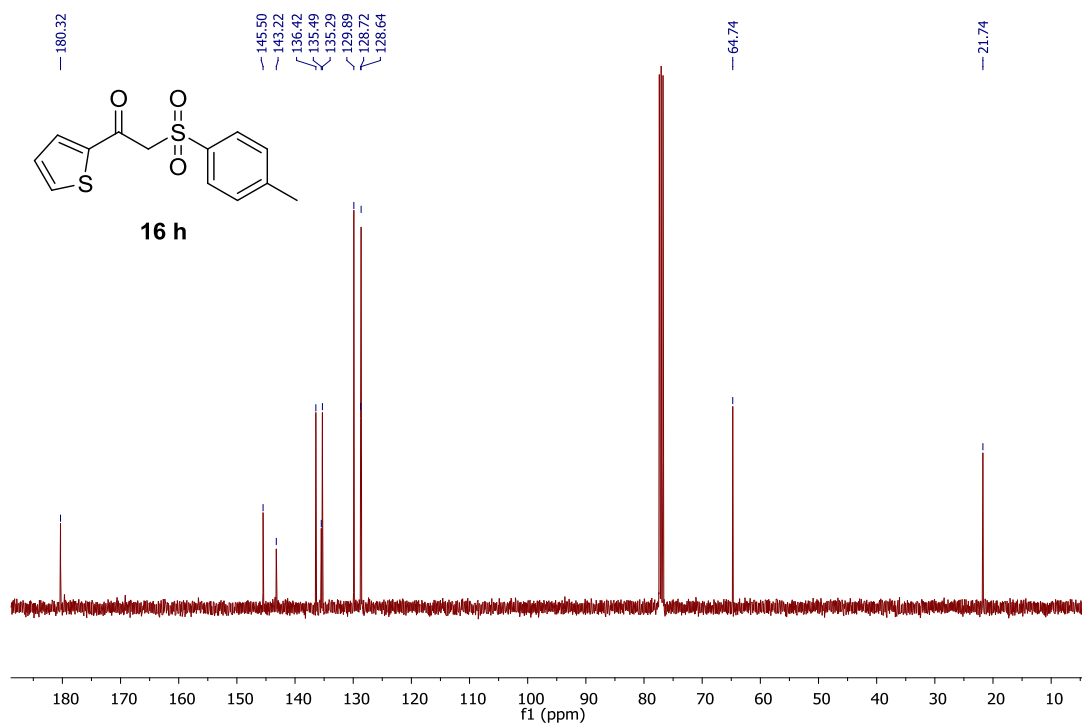

### 3. HPLC analysis of 14a after extracting from reaction mixture and washing with water.

| SAMPLE INFORMATION |                         |                     |                    |
|--------------------|-------------------------|---------------------|--------------------|
| Sample Name:       | KSCN                    | Acquired By:        | System             |
| Sample Type:       | Unknown                 | Sample Set Name:    |                    |
| Vial:              | 1                       | Acq. Method Set:    | mukund 1 half rate |
| Injection #:       | 5                       | Processing Method:  | manoj k 1          |
| Injection Volume:  | 10.00 ul                | Channel Name:       | 260.0nm            |
| Run Time:          | 15.0 Minutes            | Proc. Chnl. Descr.: | PDA 260.0 nm       |
| Date Acquired:     | 9/1/2013 7:37:38 PM IST |                     |                    |
| Date Processed:    | 9/1/2013 8:00:54 PM IST |                     |                    |

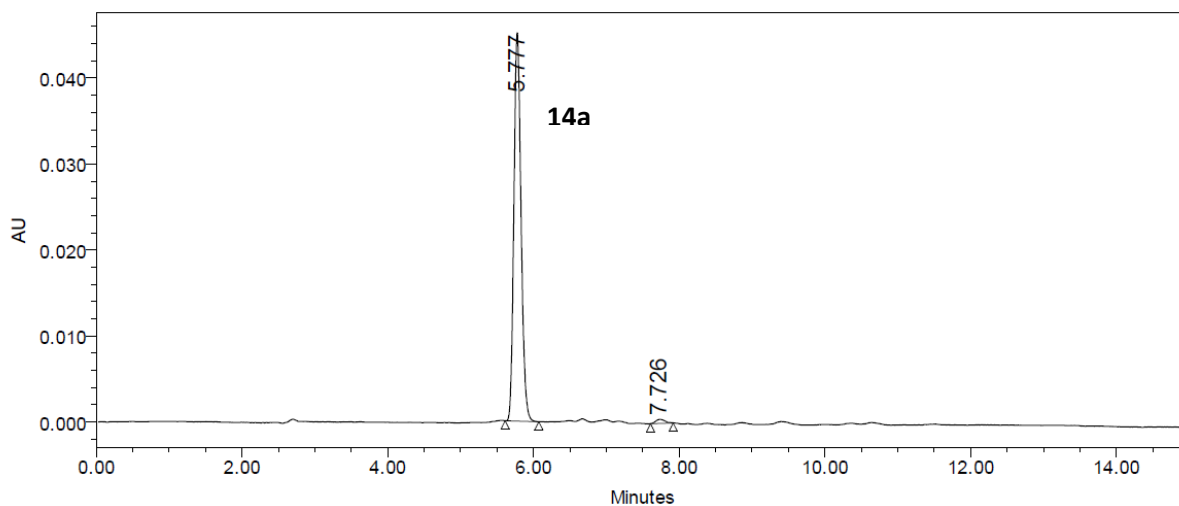

Channel: 2998; Processed Channel: PDA 260.0 nm; Result Id: 5138; Processing Method: manoj k 1

#### Processed Channel Descr.: PDA 260.0 nm

|   | Processed Channel Descr. | RT    | Area   | % Area | Height |
|---|--------------------------|-------|--------|--------|--------|
| 1 | PDA 260.0 nm             | 5.777 | 309228 | 98.71  | 45190  |
| 2 | PDA 260.0 nm             | 7.726 | 4056   | 1.29   | 464    |
